# Supplementary material for: Patient Factors Associated With Gastroesophageal Reflux Disease Diagnostic Evaluation Strategies: A Retrospective Cohort Study Using Real-World Evidence From a Large U.S. Medical Claims Database
Source: PubMed Central journal article supplement — Gastro Hep Adv. 2022 May 6;1(4):563–72. doi: 10.1016/j.gastha.2022.03.001 (PMC11307463; doi:10.1016/j.gastha.2022.03.001), 2022-05-06

## SUPPLEMENTAL MATERIAL

### Patient Factors Associated with Gastroesophageal Reflux Disease Diagnostic Evaluation Strategies: A Retrospective Cohort Study Using Real-World Evidence from a Large U.S. Medical Claims Database

Ravy K. Vajravelu, Jennifer M. Kolb, Walid F. Gellad, Frank I. Scott, Anna Tavakkoli, Amit G. Singal, David A. Katzka, Gary W. Falk, and Sachin Wani

#### **CONTENTS (hyperlinks)**

|                                                                                                                                                                                                                                             |           |
|---------------------------------------------------------------------------------------------------------------------------------------------------------------------------------------------------------------------------------------------|-----------|
| <b>Supplemental table 1. Administrative codes to identify GERD</b>                                                                                                                                                                          | <b>2</b>  |
| <b>Supplemental table 2. Administrative codes to identify exclusion criteria for newly diagnosed GERD and outcomes of interest</b>                                                                                                          | <b>3</b>  |
| <b>Supplemental table 3. Provider specialty codes</b>                                                                                                                                                                                       | <b>6</b>  |
| <b>Supplemental table 4. Upper gastrointestinal malignancy risk factors/signs codes</b>                                                                                                                                                     | <b>48</b> |
| <b>Supplemental table 5. Gastrointestinal signs/symptoms codes</b>                                                                                                                                                                          | <b>50</b> |
| <b>Supplemental table 6. Sensitivity analysis—Multivariable Cox proportional hazards regression model describing patient factors associated with completion of a gastroenterology encounter in the expanded GERD cohort (n = 1,391,537)</b> | <b>52</b> |
| <b>Supplemental figure 1. Study design diagram</b>                                                                                                                                                                                          | <b>53</b> |
| <b>Supplemental figure 2. Kaplan-Meier time to encounter with a gastroenterology provider after a diagnosis of chronic GERD (n = 484,023)</b>                                                                                               | <b>54</b> |
| <b>Supplemental figure 3. Sensitivity analysis—Kaplan-Meier time to encounter with a gastroenterology provider in the expanded GERD cohort (n = 1,391,537)</b>                                                                              | <b>55</b> |

**Supplemental table 1. Administrative codes to identify GERD**

| <u>Code</u> | <u>ICD</u> |
|-------------|------------|
| 53081       | 9          |
| K210        | 10         |
| K219        | 10         |

**Supplemental table 2. Administrative codes to identify exclusion criteria for newly diagnosed GERD and outcomes of interest**

| <u>Code</u> | <u>Description</u>  | <u>Code type</u> |
|-------------|---------------------|------------------|
| 53085       | Barrett's esophagus | ICD9             |
| K2270       | Barrett's esophagus | ICD10            |
| K22710      | Barrett's esophagus | ICD10            |
| K22711      | Barrett's esophagus | ICD10            |
| K22719      | Barrett's esophagus | ICD10            |
| 1500        | Esophageal cancer   | ICD9             |
| 1501        | Esophageal cancer   | ICD9             |
| 1502        | Esophageal cancer   | ICD9             |
| 1503        | Esophageal cancer   | ICD9             |
| 1504        | Esophageal cancer   | ICD9             |
| 1505        | Esophageal cancer   | ICD9             |
| 1508        | Esophageal cancer   | ICD9             |
| 1509        | Esophageal cancer   | ICD9             |
| C153        | Esophageal cancer   | ICD10            |
| C154        | Esophageal cancer   | ICD10            |
| C155        | Esophageal cancer   | ICD10            |
| C158        | Esophageal cancer   | ICD10            |
| C159        | Esophageal cancer   | ICD10            |
| 78720       | Dysphagia           | ICD9             |
| 78721       | Dysphagia           | ICD9             |
| 78722       | Dysphagia           | ICD9             |
| 78723       | Dysphagia           | ICD9             |
| 78724       | Dysphagia           | ICD9             |
| 78729       | Dysphagia           | ICD9             |
| R1310       | Dysphagia           | ICD10            |
| R1311       | Dysphagia           | ICD10            |
| R1312       | Dysphagia           | ICD10            |
| R1313       | Dysphagia           | ICD10            |
| R1314       | Dysphagia           | ICD10            |
| R1319       | Dysphagia           | ICD10            |
| 43233       | Upper endoscopy     | CPT              |
| 43234       | Upper endoscopy     | CPT              |
| 43235       | Upper endoscopy     | CPT              |
| 43236       | Upper endoscopy     | CPT              |
| 43237       | Upper endoscopy     | CPT              |
| 43238       | Upper endoscopy     | CPT              |
| 43239       | Upper endoscopy     | CPT              |

| <u>Code</u> | <u>Description</u> | <u>Code type</u> |
|-------------|--------------------|------------------|
| 43240       | Upper endoscopy    | CPT              |
| 43241       | Upper endoscopy    | CPT              |
| 43242       | Upper endoscopy    | CPT              |
| 43243       | Upper endoscopy    | CPT              |
| 43244       | Upper endoscopy    | CPT              |
| 43245       | Upper endoscopy    | CPT              |
| 43246       | Upper endoscopy    | CPT              |
| 43247       | Upper endoscopy    | CPT              |
| 43248       | Upper endoscopy    | CPT              |
| 43249       | Upper endoscopy    | CPT              |
| 43250       | Upper endoscopy    | CPT              |
| 43251       | Upper endoscopy    | CPT              |
| 43252       | Upper endoscopy    | CPT              |
| 43253       | Upper endoscopy    | CPT              |
| 43254       | Upper endoscopy    | CPT              |
| 43255       | Upper endoscopy    | CPT              |
| 43256       | Upper endoscopy    | CPT              |
| 43257       | Upper endoscopy    | CPT              |
| 43258       | Upper endoscopy    | CPT              |
| 43259       | Upper endoscopy    | CPT              |
| 43266       | Upper endoscopy    | CPT              |
| 43270       | Upper endoscopy    | CPT              |
| 06L34ZZ     | Upper endoscopy    | ICD10-PCS        |
| 0D554ZZ     | Upper endoscopy    | ICD10-PCS        |
| 0D558ZZ     | Upper endoscopy    | ICD10-PCS        |
| 0D564ZZ     | Upper endoscopy    | ICD10-PCS        |
| 0D568ZZ     | Upper endoscopy    | ICD10-PCS        |
| 0D594ZZ     | Upper endoscopy    | ICD10-PCS        |
| 0D598ZZ     | Upper endoscopy    | ICD10-PCS        |
| 0D774DZ     | Upper endoscopy    | ICD10-PCS        |
| 0D778DZ     | Upper endoscopy    | ICD10-PCS        |
| 0D778ZZ     | Upper endoscopy    | ICD10-PCS        |
| 0D954ZX     | Upper endoscopy    | ICD10-PCS        |
| 0D958ZX     | Upper endoscopy    | ICD10-PCS        |
| 0D964ZX     | Upper endoscopy    | ICD10-PCS        |
| 0D968ZX     | Upper endoscopy    | ICD10-PCS        |
| 0D998ZX     | Upper endoscopy    | ICD10-PCS        |
| 0DB54ZX     | Upper endoscopy    | ICD10-PCS        |
| 0DB54ZZ     | Upper endoscopy    | ICD10-PCS        |

| <u>Code</u> | <u>Description</u>     | <u>Code type</u>                          |
|-------------|------------------------|-------------------------------------------|
| 0DB58ZX     | Upper endoscopy        | ICD10-PCS                                 |
| 0DB58ZZ     | Upper endoscopy        | ICD10-PCS                                 |
| 0DB64ZX     | Upper endoscopy        | ICD10-PCS                                 |
| 0DB64ZZ     | Upper endoscopy        | ICD10-PCS                                 |
| 0DB68ZZ     | Upper endoscopy        | ICD10-PCS                                 |
| 0DB94ZZ     | Upper endoscopy        | ICD10-PCS                                 |
| 0DB98ZX     | Upper endoscopy        | ICD10-PCS                                 |
| 0DB98ZZ     | Upper endoscopy        | ICD10-PCS                                 |
| 0DD54ZX     | Upper endoscopy        | ICD10-PCS                                 |
| 0DD64ZX     | Upper endoscopy        | ICD10-PCS                                 |
| 0DD98ZX     | Upper endoscopy        | ICD10-PCS                                 |
| 0DH64UZ     | Upper endoscopy        | ICD10-PCS                                 |
| 0DW04UZ     | Upper endoscopy        | ICD10-PCS                                 |
| 0DW08UZ     | Upper endoscopy        | ICD10-PCS                                 |
| 0W3P8ZZ     | Upper endoscopy        | ICD10-PCS                                 |
| 42.24       | Upper endoscopy        | ICD9-PCS                                  |
| 42.33       | Upper endoscopy        | ICD9-PCS                                  |
| 4224        | Upper endoscopy        | ICD9-PCS                                  |
| 4233        | Upper endoscopy        | ICD9-PCS                                  |
| 43.11       | Upper endoscopy        | ICD9-PCS                                  |
| 43.41       | Upper endoscopy        | ICD9-PCS                                  |
| 4311        | Upper endoscopy        | ICD9-PCS                                  |
| 4341        | Upper endoscopy        | ICD9-PCS                                  |
| 44.14       | Upper endoscopy        | ICD9-PCS                                  |
| 44.22       | Upper endoscopy        | ICD9-PCS                                  |
| 44.32       | Upper endoscopy        | ICD9-PCS                                  |
| 44.43       | Upper endoscopy        | ICD9-PCS                                  |
| 4414        | Upper endoscopy        | ICD9-PCS                                  |
| 4422        | Upper endoscopy        | ICD9-PCS                                  |
| 4432        | Upper endoscopy        | ICD9-PCS                                  |
| 4443        | Upper endoscopy        | ICD9-PCS                                  |
| 45.16       | Upper endoscopy        | ICD9-PCS                                  |
| 45.3        | Upper endoscopy        | ICD9-PCS                                  |
| 4516        | Upper endoscopy        | ICD9-PCS                                  |
| 4530        | Upper endoscopy        | ICD9-PCS                                  |
| 56283600    | Proton pump inhibitor  | American Hospital Formulary Service class |
| 56281200    | H2 receptor antagonist | American Hospital Formulary Service class |

**Supplemental table 3. Provider specialty codes**

| <u>Code</u> | <u>Specialty</u>            | <u>Code type</u> |
|-------------|-----------------------------|------------------|
| 364S00000X  | Primary care                | Taxonomy         |
| 363A00000X  | Primary care                | Taxonomy         |
| 363L00000X  | Primary care                | Taxonomy         |
| 207YS0012X  | Otolaryngology              | Taxonomy         |
| 207Y00000X  | Otolaryngology              | Taxonomy         |
| 207YX0007X  | Otolaryngology              | Taxonomy         |
| 207YX0905X  | Otolaryngology              | Taxonomy         |
| 163WX0601X  | Otolaryngology              | Taxonomy         |
| 207YX0901X  | Otolaryngology              | Taxonomy         |
| 207YX0602X  | Otolaryngology              | Taxonomy         |
| 207YP0228X  | Otolaryngology              | Taxonomy         |
| 207YS0123X  | Otolaryngology              | Taxonomy         |
| 207QH0002X  | Primary care                | Taxonomy         |
| 207Q00000X  | Primary care                | Taxonomy         |
| 207QA0401X  | Primary care                | Taxonomy         |
| 207QG0300X  | Primary care                | Taxonomy         |
| 207QB0002X  | Primary care                | Taxonomy         |
| 363LF0000X  | Primary care                | Taxonomy         |
| 207QS1201X  | Primary care                | Taxonomy         |
| 364SF0001X  | Primary care                | Taxonomy         |
| 207QA0505X  | Primary care                | Taxonomy         |
| 207QA0000X  | Primary care                | Taxonomy         |
| 207QS0010X  | Primary care                | Taxonomy         |
| 207RG0100X  | Gastroenterology            | Taxonomy         |
| 2080P0206X  | Gastroenterology            | Taxonomy         |
| 207RT0003X  | Gastroenterology            | Taxonomy         |
| 207RI0008X  | Gastroenterology            | Taxonomy         |
| 163WG0100X  | Gastroenterology            | Taxonomy         |
| 207KA0200X  | Internal Medicine specialty | Taxonomy         |
| 174400000X  | Internal Medicine specialty | Taxonomy         |
| 207K00000X  | Internal Medicine specialty | Taxonomy         |
| 207KI0005X  | Internal Medicine specialty | Taxonomy         |
| 207RI0011X  | Internal Medicine specialty | Taxonomy         |
| 207RC0000X  | Internal Medicine specialty | Taxonomy         |
| 207RR0500X  | Internal Medicine specialty | Taxonomy         |
| 207RE0101X  | Internal Medicine specialty | Taxonomy         |
| 207RP1001X  | Internal Medicine specialty | Taxonomy         |

| <u>Code</u> | <u>Specialty</u>            | <u>Code type</u> |
|-------------|-----------------------------|------------------|
| 207RA0201X  | Internal Medicine specialty | Taxonomy         |
| 207RN0300X  | Internal Medicine specialty | Taxonomy         |
| 207RC0200X  | Internal Medicine specialty | Taxonomy         |
| 207RC0001X  | Internal Medicine specialty | Taxonomy         |
| 207RA0401X  | Internal Medicine specialty | Taxonomy         |
| 207RI0001X  | Internal Medicine specialty | Taxonomy         |
| 207RS0010X  | Internal Medicine specialty | Taxonomy         |
| 207RS0012X  | Internal Medicine specialty | Taxonomy         |
| 207RA0001X  | Internal Medicine specialty | Taxonomy         |
| 207RH0005X  | Internal Medicine specialty | Taxonomy         |
| 207RG0300X  | Internal Medicine specialty | Taxonomy         |
| 207RH0002X  | Internal Medicine specialty | Taxonomy         |
| 207RH0000X  | Internal Medicine specialty | Taxonomy         |
| 207RX0202X  | Internal Medicine specialty | Taxonomy         |
| 364SX0200X  | Internal Medicine specialty | Taxonomy         |
| 207RI0200X  | Internal Medicine specialty | Taxonomy         |
| 207RM1200X  | Internal Medicine specialty | Taxonomy         |
| 207RB0002X  | Internal Medicine specialty | Taxonomy         |
| 207RH0003X  | Internal Medicine specialty | Taxonomy         |
| 363AM0700X  | Primary care                | Taxonomy         |
| 207RA0000X  | Primary care                | Taxonomy         |
| 207R00000X  | Primary care                | Taxonomy         |
| 363LG0600X  | Primary care                | Taxonomy         |
| 363LP2300X  | Primary care                | Taxonomy         |
| 261QP2300X  | Primary care                | Taxonomy         |
| 364SC2300X  | Primary care                | Taxonomy         |
| 363LC1500X  | Primary care                | Taxonomy         |
| 364SA2200X  | Primary care                | Taxonomy         |
| 363LA2200X  | Primary care                | Taxonomy         |
| 364SC1501X  | Primary care                | Taxonomy         |
| 364SG0600X  | Primary care                | Taxonomy         |
| 4956        | Primary care                | Optum            |
| 5164        | Primary care                | Optum            |
| 5152        | Primary care                | Optum            |
| 4882        | Primary care                | Optum            |
| 5499        | Primary care                | Optum            |
| 5205        | Primary care                | Optum            |
| 5199        | Primary care                | Optum            |
| 5340        | Primary care                | Optum            |

| <u>Code</u> | <u>Specialty</u> | <u>Code type</u> |
|-------------|------------------|------------------|
| 2173        | Primary care     | Optum            |
| 5077        | Primary care     | Optum            |
| 5469        | Primary care     | Optum            |
| 4955        | Primary care     | Optum            |
| 5181        | Primary care     | Optum            |
| 4911        | Primary care     | Optum            |
| 5184        | Primary care     | Optum            |
| 5540        | Primary care     | Optum            |
| 5508        | Primary care     | Optum            |
| 5009        | Primary care     | Optum            |
| 4951        | Primary care     | Optum            |
| 5159        | Primary care     | Optum            |
| 5513        | Primary care     | Optum            |
| 5140        | Primary care     | Optum            |
| 4976        | Primary care     | Optum            |
| 5439        | Primary care     | Optum            |
| 5146        | Primary care     | Optum            |
| 5581        | Primary care     | Optum            |
| 2265        | Primary care     | Optum            |
| 5024        | Primary care     | Optum            |
| 4999        | Primary care     | Optum            |
| 4970        | Primary care     | Optum            |
| 2179        | Primary care     | Optum            |
| 6962        | Primary care     | Optum            |
| 4959        | Primary care     | Optum            |
| 5188        | Primary care     | Optum            |
| 5138        | Primary care     | Optum            |
| 5703        | Primary care     | Optum            |
| 5122        | Primary care     | Optum            |
| 5370        | Primary care     | Optum            |
| 5409        | Primary care     | Optum            |
| 3149        | Primary care     | Optum            |
| 4967        | Primary care     | Optum            |
| 5080        | Primary care     | Optum            |
| 5515        | Primary care     | Optum            |
| 7073        | Primary care     | Optum            |
| 4934        | Primary care     | Optum            |
| 2697        | Primary care     | Optum            |
| 4922        | Primary care     | Optum            |



| <u>Code</u> | <u>Specialty</u> | <u>Code type</u> |
|-------------|------------------|------------------|
| 5293        | Primary care     | Optum            |
| 5557        | Primary care     | Optum            |
| 5195        | Primary care     | Optum            |
| 5149        | Primary care     | Optum            |
| 5638        | Primary care     | Optum            |
| 5224        | Primary care     | Optum            |
| 2131        | Primary care     | Optum            |
| 5253        | Primary care     | Optum            |
| 5365        | Primary care     | Optum            |
| 5494        | Primary care     | Optum            |
| 5369        | Primary care     | Optum            |
| 5577        | Primary care     | Optum            |
| 5215        | Primary care     | Optum            |
| 4889        | Primary care     | Optum            |
| 5241        | Primary care     | Optum            |
| 5360        | Primary care     | Optum            |
| 5197        | Primary care     | Optum            |
| 5546        | Primary care     | Optum            |
| 5578        | Primary care     | Optum            |
| 4916        | Primary care     | Optum            |
| 5555        | Primary care     | Optum            |
| 5346        | Primary care     | Optum            |
| 5567        | Primary care     | Optum            |
| 5214        | Primary care     | Optum            |
| 4945        | Primary care     | Optum            |
| 5097        | Primary care     | Optum            |
| 5378        | Primary care     | Optum            |
| 5375        | Primary care     | Optum            |
| 4944        | Primary care     | Optum            |
| 4982        | Primary care     | Optum            |
| 5576        | Primary care     | Optum            |
| 5452        | Primary care     | Optum            |
| 2279        | Primary care     | Optum            |
| 4919        | Primary care     | Optum            |
| 5327        | Primary care     | Optum            |
| 5210        | Primary care     | Optum            |
| 5678        | Primary care     | Optum            |
| 4950        | Primary care     | Optum            |
| 5456        | Primary care     | Optum            |

| <u>Code</u> | <u>Specialty</u> | <u>Code type</u> |
|-------------|------------------|------------------|
| 4865        | Primary care     | Optum            |
| 4957        | Primary care     | Optum            |
| 5240        | Primary care     | Optum            |
| 4962        | Primary care     | Optum            |
| 5438        | Primary care     | Optum            |
| 5617        | Primary care     | Optum            |
| 4966        | Primary care     | Optum            |
| 5043        | Primary care     | Optum            |
| 5307        | Primary care     | Optum            |
| 5286        | Primary care     | Optum            |
| 4902        | Primary care     | Optum            |
| 4210        | Primary care     | Optum            |
| 5565        | Primary care     | Optum            |
| 5300        | Primary care     | Optum            |
| 5000        | Primary care     | Optum            |
| 4860        | Primary care     | Optum            |
| 4989        | Primary care     | Optum            |
| 5427        | Primary care     | Optum            |
| 5304        | Primary care     | Optum            |
| 5393        | Primary care     | Optum            |
| 5192        | Primary care     | Optum            |
| 5371        | Primary care     | Optum            |
| 5503        | Primary care     | Optum            |
| 5136        | Primary care     | Optum            |
| 5242        | Primary care     | Optum            |
| 4997        | Primary care     | Optum            |
| 6738        | Primary care     | Optum            |
| 5166        | Primary care     | Optum            |
| 5554        | Primary care     | Optum            |
| 5473        | Primary care     | Optum            |
| 5474        | Primary care     | Optum            |
| 4827        | Primary care     | Optum            |
| 5521        | Primary care     | Optum            |
| 4931        | Primary care     | Optum            |
| 6646        | Primary care     | Optum            |
| 3211        | Primary care     | Optum            |
| 4964        | Primary care     | Optum            |
| 5252        | Primary care     | Optum            |
| 5532        | Primary care     | Optum            |

| <u>Code</u> | <u>Specialty</u> | <u>Code type</u> |
|-------------|------------------|------------------|
| 5534        | Primary care     | Optum            |
| 4896        | Primary care     | Optum            |
| 5407        | Primary care     | Optum            |
| 5350        | Primary care     | Optum            |
| 2308        | Primary care     | Optum            |
| 5133        | Primary care     | Optum            |
| 4868        | Primary care     | Optum            |
| 3153        | Primary care     | Optum            |
| 5536        | Primary care     | Optum            |
| 4947        | Primary care     | Optum            |
| 5312        | Primary care     | Optum            |
| 5564        | Primary care     | Optum            |
| 5098        | Primary care     | Optum            |
| 4938        | Primary care     | Optum            |
| 4891        | Primary care     | Optum            |
| 5571        | Primary care     | Optum            |
| 4872        | Primary care     | Optum            |
| 4949        | Primary care     | Optum            |
| 5095        | Primary care     | Optum            |
| 4874        | Primary care     | Optum            |
| 4910        | Primary care     | Optum            |
| 4983        | Primary care     | Optum            |
| 5568        | Primary care     | Optum            |
| 2557        | Primary care     | Optum            |
| 5509        | Primary care     | Optum            |
| 4992        | Primary care     | Optum            |
| 2723        | Primary care     | Optum            |
| 5594        | Primary care     | Optum            |
| 5207        | Primary care     | Optum            |
| 5229        | Primary care     | Optum            |
| 3970        | Primary care     | Optum            |
| 5179        | Primary care     | Optum            |
| 5398        | Primary care     | Optum            |
| 4907        | Primary care     | Optum            |
| 5311        | Primary care     | Optum            |
| 7088        | Primary care     | Optum            |
| 2237        | Primary care     | Optum            |
| 1581        | Primary care     | Optum            |
| 5636        | Primary care     | Optum            |

| <u>Code</u> | <u>Specialty</u> | <u>Code type</u> |
|-------------|------------------|------------------|
| 4924        | Primary care     | Optum            |
| 5641        | Primary care     | Optum            |
| 4996        | Primary care     | Optum            |
| 5538        | Primary care     | Optum            |
| 5124        | Primary care     | Optum            |
| 4930        | Primary care     | Optum            |
| 5445        | Primary care     | Optum            |
| 4936        | Primary care     | Optum            |
| 5458        | Primary care     | Optum            |
| 5587        | Primary care     | Optum            |
| 4905        | Primary care     | Optum            |
| 5161        | Primary care     | Optum            |
| 5379        | Primary care     | Optum            |
| 4943        | Primary care     | Optum            |
| 5233        | Primary care     | Optum            |
| 5634        | Primary care     | Optum            |
| 5110        | Primary care     | Optum            |
| 5310        | Primary care     | Optum            |
| 4985        | Primary care     | Optum            |
| 5372        | Primary care     | Optum            |
| 5569        | Primary care     | Optum            |
| 5354        | Primary care     | Optum            |
| 4965        | Primary care     | Optum            |
| 5470        | Primary care     | Optum            |
| 5212        | Primary care     | Optum            |
| 5551        | Primary care     | Optum            |
| 5216        | Primary care     | Optum            |
| 5035        | Primary care     | Optum            |
| 5261        | Primary care     | Optum            |
| 5071        | Primary care     | Optum            |
| 5563        | Primary care     | Optum            |
| 4877        | Primary care     | Optum            |
| 5182        | Primary care     | Optum            |
| 5418        | Primary care     | Optum            |
| 5506        | Primary care     | Optum            |
| 4935        | Primary care     | Optum            |
| 5201        | Primary care     | Optum            |
| 4869        | Primary care     | Optum            |
| 2680        | Primary care     | Optum            |

| <u>Code</u> | <u>Specialty</u> | <u>Code type</u> |
|-------------|------------------|------------------|
| 5366        | Primary care     | Optum            |
| 5196        | Primary care     | Optum            |
| 5441        | Primary care     | Optum            |
| 5465        | Primary care     | Optum            |
| 4908        | Primary care     | Optum            |
| 5417        | Primary care     | Optum            |
| 5177        | Primary care     | Optum            |
| 5194        | Primary care     | Optum            |
| 4948        | Primary care     | Optum            |
| 4971        | Primary care     | Optum            |
| 1944        | Primary care     | Optum            |
| 5073        | Primary care     | Optum            |
| 5156        | Primary care     | Optum            |
| 5016        | Primary care     | Optum            |
| 5167        | Primary care     | Optum            |
| 4887        | Primary care     | Optum            |
| 5173        | Primary care     | Optum            |
| 5163        | Primary care     | Optum            |
| 4867        | Primary care     | Optum            |
| 2504        | Primary care     | Optum            |
| 5169        | Primary care     | Optum            |
| 5019        | Primary care     | Optum            |
| 5258        | Primary care     | Optum            |
| 5388        | Primary care     | Optum            |
| 5193        | Primary care     | Optum            |
| 5432        | Primary care     | Optum            |
| 5660        | Primary care     | Optum            |
| 5151        | Primary care     | Optum            |
| 5301        | Primary care     | Optum            |
| 4929        | Primary care     | Optum            |
| 4866        | Primary care     | Optum            |
| 3935        | Primary care     | Optum            |
| 5384        | Primary care     | Optum            |
| 5123        | Primary care     | Optum            |
| 5006        | Primary care     | Optum            |
| 5134        | Primary care     | Optum            |
| 5001        | Primary care     | Optum            |
| 4963        | Primary care     | Optum            |
| 5028        | Primary care     | Optum            |

| <u>Code</u> | <u>Specialty</u> | <u>Code type</u> |
|-------------|------------------|------------------|
| 4973        | Primary care     | Optum            |
| 5446        | Primary care     | Optum            |
| 5562        | Primary care     | Optum            |
| 5246        | Primary care     | Optum            |
| 5651        | Primary care     | Optum            |
| 2918        | Primary care     | Optum            |
| 5108        | Primary care     | Optum            |
| 5502        | Primary care     | Optum            |
| 5586        | Primary care     | Optum            |
| 5514        | Primary care     | Optum            |
| 5147        | Primary care     | Optum            |
| 5226        | Primary care     | Optum            |
| 5118        | Primary care     | Optum            |
| 5171        | Primary care     | Optum            |
| 5208        | Primary care     | Optum            |
| 5013        | Primary care     | Optum            |
| 5150        | Primary care     | Optum            |
| 5589        | Primary care     | Optum            |
| 5511        | Primary care     | Optum            |
| 4884        | Primary care     | Optum            |
| 3266        | Primary care     | Optum            |
| 249         | Primary care     | Optum            |
| 5857        | Primary care     | Optum            |
| 4007        | Primary care     | Optum            |
| 5141        | Primary care     | Optum            |
| 4987        | Primary care     | Optum            |
| 1751        | Primary care     | Optum            |
| 4862        | Primary care     | Optum            |
| 5496        | Primary care     | Optum            |
| 5482        | Primary care     | Optum            |
| 4897        | Primary care     | Optum            |
| 4952        | Primary care     | Optum            |
| 2306        | Primary care     | Optum            |
| 5129        | Primary care     | Optum            |
| 6350        | Primary care     | Optum            |
| 5373        | Primary care     | Optum            |
| 2170        | Primary care     | Optum            |
| 5374        | Primary care     | Optum            |
| 5437        | Primary care     | Optum            |

| <u>Code</u> | <u>Specialty</u> | <u>Code type</u> |
|-------------|------------------|------------------|
| 5497        | Primary care     | Optum            |
| 5505        | Primary care     | Optum            |
| 5230        | Primary care     | Optum            |
| 5011        | Primary care     | Optum            |
| 5232        | Primary care     | Optum            |
| 4022        | Primary care     | Optum            |
| 5471        | Primary care     | Optum            |
| 6853        | Primary care     | Optum            |
| 3602        | Primary care     | Optum            |
| 5114        | Primary care     | Optum            |
| 4968        | Primary care     | Optum            |
| 5583        | Primary care     | Optum            |
| 5256        | Primary care     | Optum            |
| 4980        | Primary care     | Optum            |
| 5541        | Primary care     | Optum            |
| 5401        | Primary care     | Optum            |
| 5394        | Primary care     | Optum            |
| 5157        | Primary care     | Optum            |
| 5448        | Primary care     | Optum            |
| 5008        | Primary care     | Optum            |
| 4864        | Primary care     | Optum            |
| 5249        | Primary care     | Optum            |
| 1931        | Primary care     | Optum            |
| 5592        | Primary care     | Optum            |
| 5495        | Primary care     | Optum            |
| 5620        | Primary care     | Optum            |
| 2436        | Primary care     | Optum            |
| 4925        | Primary care     | Optum            |
| 4909        | Primary care     | Optum            |
| 5154        | Primary care     | Optum            |
| 5449        | Primary care     | Optum            |
| 5621        | Primary care     | Optum            |
| 1724        | Primary care     | Optum            |
| 2209        | Primary care     | Optum            |
| 5121        | Primary care     | Optum            |
| 5504        | Primary care     | Optum            |
| 4939        | Primary care     | Optum            |
| 5268        | Primary care     | Optum            |
| 5106        | Primary care     | Optum            |

| <u>Code</u> | <u>Specialty</u> | <u>Code type</u> |
|-------------|------------------|------------------|
| 4990        | Primary care     | Optum            |
| 5079        | Primary care     | Optum            |
| 5383        | Primary care     | Optum            |
| 5480        | Primary care     | Optum            |
| 5316        | Primary care     | Optum            |
| 5185        | Primary care     | Optum            |
| 4941        | Primary care     | Optum            |
| 5364        | Primary care     | Optum            |
| 5033        | Primary care     | Optum            |
| 5127        | Primary care     | Optum            |
| 5186        | Primary care     | Optum            |
| 4933        | Primary care     | Optum            |
| 4928        | Primary care     | Optum            |
| 5183        | Primary care     | Optum            |
| 5014        | Primary care     | Optum            |
| 5180        | Primary care     | Optum            |
| 5160        | Primary care     | Optum            |
| 5235        | Primary care     | Optum            |
| 1318        | Primary care     | Optum            |
| 5100        | Primary care     | Optum            |
| 4892        | Primary care     | Optum            |
| 5624        | Primary care     | Optum            |
| 5605        | Primary care     | Optum            |
| 4954        | Primary care     | Optum            |
| 4875        | Primary care     | Optum            |
| 5155        | Primary care     | Optum            |
| 5335        | Primary care     | Optum            |
| 5334        | Primary care     | Optum            |
| 5002        | Primary care     | Optum            |
| 4886        | Primary care     | Optum            |
| 5259        | Primary care     | Optum            |
| 4885        | Primary care     | Optum            |
| 2030        | Primary care     | Optum            |
| 5570        | Primary care     | Optum            |
| 5153        | Primary care     | Optum            |
| 2300        | Primary care     | Optum            |
| 5120        | Primary care     | Optum            |
| 5137        | Primary care     | Optum            |
| 4926        | Primary care     | Optum            |



| <u>Code</u> | <u>Specialty</u> | <u>Code type</u> |
|-------------|------------------|------------------|
| 4918        | Primary care     | Optum            |
| 5162        | Primary care     | Optum            |
| 5368        | Primary care     | Optum            |
| 5130        | Primary care     | Optum            |
| 5168        | Primary care     | Optum            |
| 5305        | Primary care     | Optum            |
| 5270        | Primary care     | Optum            |
| 5126        | Primary care     | Optum            |
| 5125        | Primary care     | Optum            |
| 4906        | Primary care     | Optum            |
| 5421        | Primary care     | Optum            |
| 5119        | Primary care     | Optum            |
| 4888        | Primary care     | Optum            |
| 5116        | Primary care     | Optum            |
| 5391        | Primary care     | Optum            |
| 5493        | Primary care     | Optum            |
| 5425        | Primary care     | Optum            |
| 5510        | Primary care     | Optum            |
| 4984        | Primary care     | Optum            |
| 5139        | Primary care     | Optum            |
| 5219        | Primary care     | Optum            |
| 5330        | Primary care     | Optum            |
| 5044        | Primary care     | Optum            |
| 5105        | Primary care     | Optum            |
| 5221        | Primary care     | Optum            |
| 5512        | Primary care     | Optum            |
| 5584        | Primary care     | Optum            |
| 4861        | Primary care     | Optum            |
| 5231        | Primary care     | Optum            |
| 5099        | Primary care     | Optum            |
| 5031        | Primary care     | Optum            |
| 4915        | Primary care     | Optum            |
| 7222        | Primary care     | Optum            |
| 5094        | Primary care     | Optum            |
| 5062        | Primary care     | Optum            |
| 4953        | Primary care     | Optum            |
| 5189        | Primary care     | Optum            |
| 5313        | Primary care     | Optum            |
| 5036        | Primary care     | Optum            |

| <u>Code</u> | <u>Specialty</u> | <u>Code type</u> |
|-------------|------------------|------------------|
| 5389        | Primary care     | Optum            |
| 5084        | Primary care     | Optum            |
| 5083        | Primary care     | Optum            |
| 5462        | Primary care     | Optum            |
| 5081        | Primary care     | Optum            |
| 5078        | Primary care     | Optum            |
| 7365        | Primary care     | Optum            |
| 5317        | Primary care     | Optum            |
| 3524        | Primary care     | Optum            |
| 5250        | Primary care     | Optum            |
| 4920        | Primary care     | Optum            |
| 4981        | Primary care     | Optum            |
| 4979        | Primary care     | Optum            |
| 5074        | Primary care     | Optum            |
| 5225        | Primary care     | Optum            |
| 4917        | Primary care     | Optum            |
| 4115        | Primary care     | Optum            |
| 4940        | Primary care     | Optum            |
| 5308        | Primary care     | Optum            |
| 4894        | Primary care     | Optum            |
| 5507        | Primary care     | Optum            |
| 250         | Primary care     | Optum            |
| 5045        | Primary care     | Optum            |
| 3717        | Primary care     | Optum            |
| 4932        | Primary care     | Optum            |
| 4878        | Primary care     | Optum            |
| 5038        | Primary care     | Optum            |
| 5332        | Primary care     | Optum            |
| 5598        | Primary care     | Optum            |
| 5034        | Primary care     | Optum            |
| 4898        | Primary care     | Optum            |
| 5257        | Primary care     | Optum            |
| 5176        | Primary care     | Optum            |
| 5030        | Primary care     | Optum            |
| 3971        | Primary care     | Optum            |
| 7291        | Primary care     | Optum            |
| 5027        | Primary care     | Optum            |
| 4895        | Primary care     | Optum            |
| 5460        | Primary care     | Optum            |

| <u>Code</u> | <u>Specialty</u> | <u>Code type</u> |
|-------------|------------------|------------------|
| 5158        | Primary care     | Optum            |
| 2655        | Primary care     | Optum            |
| 1152        | Primary care     | Optum            |
| 4978        | Primary care     | Optum            |
| 5018        | Primary care     | Optum            |
| 5309        | Primary care     | Optum            |
| 4974        | Primary care     | Optum            |
| 5148        | Primary care     | Optum            |
| 5490        | Primary care     | Optum            |
| 5010        | Primary care     | Optum            |
| 5498        | Primary care     | Optum            |
| 5613        | Primary care     | Optum            |
| 5007        | Primary care     | Optum            |
| 4969        | Primary care     | Optum            |
| 5615        | Primary care     | Optum            |
| 5198        | Primary care     | Optum            |
| 5003        | Primary care     | Optum            |
| 5318        | Primary care     | Optum            |
| 5376        | Primary care     | Optum            |
| 5328        | Primary care     | Optum            |
| 5220        | Primary care     | Optum            |
| 5266        | Primary care     | Optum            |
| 4995        | Primary care     | Optum            |
| 5020        | Primary care     | Optum            |
| 4991        | Primary care     | Optum            |
| 5128        | Primary care     | Optum            |
| 6570        | Primary care     | Optum            |
| 3089        | Primary care     | Optum            |
| 1567        | Primary care     | Optum            |
| 5539        | Primary care     | Optum            |
| 4960        | Primary care     | Optum            |
| 4899        | Primary care     | Optum            |
| 5333        | Primary care     | Optum            |
| 5203        | Primary care     | Optum            |
| 5422        | Primary care     | Optum            |
| 5200        | Primary care     | Optum            |
| 4927        | Primary care     | Optum            |
| 5491        | Primary care     | Optum            |
| 5103        | Primary care     | Optum            |

| <u>Code</u> | <u>Specialty</u> | <u>Code type</u> |
|-------------|------------------|------------------|
| 4961        | Primary care     | Optum            |
| 5145        | Primary care     | Optum            |
| 5190        | Primary care     | Optum            |
| 5610        | Primary care     | Optum            |
| 4075        | Primary care     | Optum            |
| 4170        | Primary care     | Optum            |
| 1245        | Primary care     | Optum            |
| 4893        | Primary care     | Optum            |
| 4998        | Primary care     | Optum            |
| 5223        | Primary care     | Optum            |
| 5187        | Primary care     | Optum            |
| 5597        | Primary care     | Optum            |
| 5191        | Primary care     | Optum            |
| 3360        | Primary care     | Optum            |
| 5082        | Primary care     | Optum            |
| 5414        | Primary care     | Optum            |
| 5178        | Primary care     | Optum            |
| 5172        | Primary care     | Optum            |
| 4890        | Primary care     | Optum            |
| 3583        | Primary care     | Optum            |
| 5475        | Primary care     | Optum            |
| 5461        | Primary care     | Optum            |
| 5238        | Primary care     | Optum            |
| 4958        | Primary care     | Optum            |
| 6959        | Primary care     | Optum            |
| 5175        | Primary care     | Optum            |
| 2876        | Primary care     | Optum            |
| 3808        | Primary care     | Optum            |
| 3433        | Primary care     | Optum            |
| 5267        | Primary care     | Optum            |
| 5204        | Primary care     | Optum            |
| 4903        | Primary care     | Optum            |
| 4972        | Primary care     | Optum            |
| 1132        | Primary care     | Optum            |
| 5209        | Primary care     | Optum            |
| 4975        | Primary care     | Optum            |
| 4923        | Primary care     | Optum            |
| 2694        | Primary care     | Optum            |
| 5685        | Primary care     | Optum            |

| <u>Code</u> | <u>Specialty</u> | <u>Code type</u> |
|-------------|------------------|------------------|
| 5206        | Primary care     | Optum            |
| 2374        | Primary care     | Optum            |
| 5236        | Primary care     | Optum            |
| 1358        | Primary care     | Optum            |
| 2475        | Primary care     | Optum            |
| 5558        | Primary care     | Optum            |
| 5117        | Primary care     | Optum            |
| 5416        | Primary care     | Optum            |
| 4921        | Primary care     | Optum            |
| 2069        | Primary care     | Optum            |
| 5218        | Primary care     | Optum            |
| 5415        | Primary care     | Optum            |
| 4213        | Primary care     | Optum            |
| 5347        | Primary care     | Optum            |
| 5527        | Primary care     | Optum            |
| 135         | Primary care     | Optum            |
| 5599        | Primary care     | Optum            |
| 5382        | Primary care     | Optum            |
| 5426        | Primary care     | Optum            |
| 5455        | Primary care     | Optum            |
| 4081        | Primary care     | Optum            |
| 5476        | Primary care     | Optum            |
| 5591        | Primary care     | Optum            |
| 5525        | Primary care     | Optum            |
| 5358        | Primary care     | Optum            |
| 5618        | Primary care     | Optum            |
| 5413        | Primary care     | Optum            |
| 5595        | Primary care     | Optum            |
| 5436        | Primary care     | Optum            |
| 5544        | Primary care     | Optum            |
| 5616        | Primary care     | Optum            |
| 5408        | Primary care     | Optum            |
| 3790        | Primary care     | Optum            |
| 5530        | Primary care     | Optum            |
| 5661        | Primary care     | Optum            |
| 5454        | Primary care     | Optum            |
| 5593        | Primary care     | Optum            |
| 5387        | Primary care     | Optum            |
| 5390        | Primary care     | Optum            |

| <u>Code</u> | <u>Specialty</u> | <u>Code type</u> |
|-------------|------------------|------------------|
| 5431        | Primary care     | Optum            |
| 3145        | Primary care     | Optum            |
| 5580        | Primary care     | Optum            |
| 5440        | Primary care     | Optum            |
| 2291        | Primary care     | Optum            |
| 5429        | Primary care     | Optum            |
| 5560        | Primary care     | Optum            |
| 5430        | Primary care     | Optum            |
| 5990        | Primary care     | Optum            |
| 5428        | Primary care     | Optum            |
| 5553        | Primary care     | Optum            |
| 5479        | Primary care     | Optum            |
| 5533        | Primary care     | Optum            |
| 5523        | Primary care     | Optum            |
| 5614        | Primary care     | Optum            |
| 3760        | Primary care     | Optum            |
| 5337        | Primary care     | Optum            |
| 1775        | Primary care     | Optum            |
| 5484        | Primary care     | Optum            |
| 5537        | Primary care     | Optum            |
| 5433        | Primary care     | Optum            |
| 1640        | Primary care     | Optum            |
| 5395        | Primary care     | Optum            |
| 5481        | Primary care     | Optum            |
| 5596        | Primary care     | Optum            |
| 2227        | Primary care     | Optum            |
| 2635        | Primary care     | Optum            |
| 5632        | Primary care     | Optum            |
| 5411        | Primary care     | Optum            |
| 1569        | Primary care     | Optum            |
| 2419        | Primary care     | Optum            |
| 5451        | Primary care     | Optum            |
| 5345        | Primary care     | Optum            |
| 2754        | Primary care     | Optum            |
| 5612        | Primary care     | Optum            |
| 5453        | Primary care     | Optum            |
| 3395        | Primary care     | Optum            |
| 5529        | Primary care     | Optum            |
| 7299        | Primary care     | Optum            |

| <u>Code</u> | <u>Specialty</u> | <u>Code type</u> |
|-------------|------------------|------------------|
| 5410        | Primary care     | Optum            |
| 2132        | Primary care     | Optum            |
| 5488        | Primary care     | Optum            |
| 5644        | Primary care     | Optum            |
| 5575        | Primary care     | Optum            |
| 5468        | Primary care     | Optum            |
| 5341        | Primary care     | Optum            |
| 4036        | Primary care     | Optum            |
| 5528        | Primary care     | Optum            |
| 5500        | Primary care     | Optum            |
| 5518        | Primary care     | Optum            |
| 1723        | Primary care     | Optum            |
| 5635        | Primary care     | Optum            |
| 5547        | Primary care     | Optum            |
| 5640        | Primary care     | Optum            |
| 1356        | Primary care     | Optum            |
| 5434        | Primary care     | Optum            |
| 5363        | Primary care     | Optum            |
| 5543        | Primary care     | Optum            |
| 5464        | Primary care     | Optum            |
| 5531        | Primary care     | Optum            |
| 5582        | Primary care     | Optum            |
| 3358        | Primary care     | Optum            |
| 5501        | Primary care     | Optum            |
| 5559        | Primary care     | Optum            |
| 5619        | Primary care     | Optum            |
| 1568        | Primary care     | Optum            |
| 1969        | Primary care     | Optum            |
| 5572        | Primary care     | Optum            |
| 5405        | Primary care     | Optum            |
| 5561        | Primary care     | Optum            |
| 5450        | Primary care     | Optum            |
| 5492        | Primary care     | Optum            |
| 5535        | Primary care     | Optum            |
| 5556        | Primary care     | Optum            |
| 5566        | Primary care     | Optum            |
| 5457        | Primary care     | Optum            |
| 5412        | Primary care     | Optum            |
| 2779        | Primary care     | Optum            |

| <u>Code</u> | <u>Specialty</u> | <u>Code type</u> |
|-------------|------------------|------------------|
| 5351        | Primary care     | Optum            |
| 5348        | Primary care     | Optum            |
| 5545        | Primary care     | Optum            |
| 5637        | Primary care     | Optum            |
| 5377        | Primary care     | Optum            |
| 2932        | Primary care     | Optum            |
| 5623        | Primary care     | Optum            |
| 5649        | Primary care     | Optum            |
| 5579        | Primary care     | Optum            |
| 5165        | Primary care     | Optum            |
| 5444        | Primary care     | Optum            |
| 5463        | Primary care     | Optum            |
| 5519        | Primary care     | Optum            |
| 5400        | Primary care     | Optum            |
| 5684        | Primary care     | Optum            |
| 3135        | Primary care     | Optum            |
| 5516        | Primary care     | Optum            |
| 5478        | Primary care     | Optum            |
| 5517        | Primary care     | Optum            |
| 5629        | Primary care     | Optum            |
| 5420        | Primary care     | Optum            |
| 5423        | Primary care     | Optum            |
| 2599        | Primary care     | Optum            |
| 5520        | Primary care     | Optum            |
| 5522        | Primary care     | Optum            |
| 5342        | Primary care     | Optum            |
| 2205        | Primary care     | Optum            |
| 5489        | Primary care     | Optum            |
| 1126        | Primary care     | Optum            |
| 1722        | Primary care     | Optum            |
| 5424        | Primary care     | Optum            |
| 5386        | Primary care     | Optum            |
| 5604        | Primary care     | Optum            |
| 5356        | Primary care     | Optum            |
| 5483        | Primary care     | Optum            |
| 3152        | Primary care     | Optum            |
| 5477        | Primary care     | Optum            |
| 5652        | Primary care     | Optum            |
| 5397        | Primary care     | Optum            |



| <u>Code</u> | <u>Specialty</u> | <u>Code type</u> |
|-------------|------------------|------------------|
| 5486        | Primary care     | Optum            |
| 5526        | Primary care     | Optum            |
| 5485        | Primary care     | Optum            |
| 2181        | Primary care     | Optum            |
| 2768        | Primary care     | Optum            |
| 5550        | Primary care     | Optum            |
| 1666        | Primary care     | Optum            |
| 5548        | Primary care     | Optum            |
| 5435        | Primary care     | Optum            |
| 3632        | Primary care     | Optum            |
| 5399        | Primary care     | Optum            |
| 5552        | Primary care     | Optum            |
| 5542        | Primary care     | Optum            |
| 5487        | Primary care     | Optum            |
| 3067        | Primary care     | Optum            |
| 5467        | Primary care     | Optum            |
| 5628        | Primary care     | Optum            |
| 5392        | Primary care     | Optum            |
| 5353        | Primary care     | Optum            |
| 5442        | Primary care     | Optum            |
| 5443        | Primary care     | Optum            |
| 5402        | Primary care     | Optum            |
| 5447        | Primary care     | Optum            |
| 2305        | Primary care     | Optum            |
| 5396        | Primary care     | Optum            |
| 2224        | Primary care     | Optum            |
| 2897        | Otolaryngology   | Optum            |
| 1441        | Otolaryngology   | Optum            |
| 698         | Otolaryngology   | Optum            |
| 696         | Otolaryngology   | Optum            |
| 697         | Otolaryngology   | Optum            |
| 693         | Otolaryngology   | Optum            |
| 1902        | Otolaryngology   | Optum            |
| 5766        | Otolaryngology   | Optum            |
| 3463        | Otolaryngology   | Optum            |
| 7747        | Otolaryngology   | Optum            |
| 2444        | Otolaryngology   | Optum            |
| 1819        | Otolaryngology   | Optum            |
| 2080        | Otolaryngology   | Optum            |

| <u>Code</u> | <u>Specialty</u> | <u>Code type</u> |
|-------------|------------------|------------------|
| 1676        | Otolaryngology   | Optum            |
| 7669        | Otolaryngology   | Optum            |
| 6669        | Otolaryngology   | Optum            |
| 695         | Otolaryngology   | Optum            |
| 701         | Otolaryngology   | Optum            |
| 2495        | Otolaryngology   | Optum            |
| 2638        | Otolaryngology   | Optum            |
| 2690        | Otolaryngology   | Optum            |
| 1119        | Otolaryngology   | Optum            |
| 4074        | Otolaryngology   | Optum            |
| 2850        | Otolaryngology   | Optum            |
| 6860        | Otolaryngology   | Optum            |
| 700         | Otolaryngology   | Optum            |
| 3994        | Otolaryngology   | Optum            |
| 7220        | Otolaryngology   | Optum            |
| 2104        | Otolaryngology   | Optum            |
| 2213        | Otolaryngology   | Optum            |
| 7677        | Otolaryngology   | Optum            |
| 3985        | Otolaryngology   | Optum            |
| 6911        | Otolaryngology   | Optum            |
| 7590        | Otolaryngology   | Optum            |
| 5841        | Otolaryngology   | Optum            |
| 7281        | Otolaryngology   | Optum            |
| 699         | Otolaryngology   | Optum            |
| 2530        | Otolaryngology   | Optum            |
| 1928        | Otolaryngology   | Optum            |
| 1714        | Otolaryngology   | Optum            |
| 4085        | Otolaryngology   | Optum            |
| 1877        | Otolaryngology   | Optum            |
| 5765        | Otolaryngology   | Optum            |
| 2985        | Otolaryngology   | Optum            |
| 1381        | Otolaryngology   | Optum            |
| 2995        | Otolaryngology   | Optum            |
| 2277        | Otolaryngology   | Optum            |
| 3639        | Otolaryngology   | Optum            |
| 2229        | Otolaryngology   | Optum            |
| 2908        | Otolaryngology   | Optum            |
| 702         | Otolaryngology   | Optum            |
| 1882        | Otolaryngology   | Optum            |

| <u>Code</u> | <u>Specialty</u> | <u>Code type</u> |
|-------------|------------------|------------------|
| 3884        | Otolaryngology   | Optum            |
| 6235        | Otolaryngology   | Optum            |
| 2961        | Otolaryngology   | Optum            |
| 704         | Otolaryngology   | Optum            |
| 694         | Otolaryngology   | Optum            |
| 703         | Otolaryngology   | Optum            |
| 1403        | Otolaryngology   | Optum            |
| 5918        | Otolaryngology   | Optum            |
| 706         | Otolaryngology   | Optum            |
| 711         | Otolaryngology   | Optum            |
| 5744        | Otolaryngology   | Optum            |
| 1746        | Otolaryngology   | Optum            |
| 707         | Otolaryngology   | Optum            |
| 705         | Otolaryngology   | Optum            |
| 6774        | Otolaryngology   | Optum            |
| 5665        | Otolaryngology   | Optum            |
| 712         | Otolaryngology   | Optum            |
| 709         | Otolaryngology   | Optum            |
| 708         | Otolaryngology   | Optum            |
| 1457        | Otolaryngology   | Optum            |
| 710         | Otolaryngology   | Optum            |
| 7623        | Gastroenterology | Optum            |
| 4247        | Gastroenterology | Optum            |
| 3334        | Gastroenterology | Optum            |
| 7354        | Gastroenterology | Optum            |
| 6286        | Gastroenterology | Optum            |
| 6586        | Gastroenterology | Optum            |
| 474         | Gastroenterology | Optum            |
| 3032        | Gastroenterology | Optum            |
| 2948        | Gastroenterology | Optum            |
| 473         | Gastroenterology | Optum            |
| 4261        | Gastroenterology | Optum            |
| 475         | Gastroenterology | Optum            |
| 1663        | Gastroenterology | Optum            |
| 476         | Gastroenterology | Optum            |
| 1700        | Gastroenterology | Optum            |
| 3797        | Gastroenterology | Optum            |
| 7167        | Gastroenterology | Optum            |
| 6768        | Gastroenterology | Optum            |

| <u>Code</u> | <u>Specialty</u> | <u>Code type</u> |
|-------------|------------------|------------------|
| 2417        | Gastroenterology | Optum            |
| 5767        | Gastroenterology | Optum            |
| 3597        | Gastroenterology | Optum            |
| 3236        | Gastroenterology | Optum            |
| 7356        | Gastroenterology | Optum            |
| 4643        | Gastroenterology | Optum            |
| 2085        | Gastroenterology | Optum            |
| 3237        | Gastroenterology | Optum            |
| 7211        | Gastroenterology | Optum            |
| 5769        | Gastroenterology | Optum            |
| 2018        | Gastroenterology | Optum            |
| 2402        | Gastroenterology | Optum            |
| 1131        | Gastroenterology | Optum            |
| 5940        | Gastroenterology | Optum            |
| 477         | Gastroenterology | Optum            |
| 478         | Gastroenterology | Optum            |
| 479         | Gastroenterology | Optum            |
| 1427        | Gastroenterology | Optum            |
| 3066        | Gastroenterology | Optum            |
| 470         | Gastroenterology | Optum            |
| 2389        | Gastroenterology | Optum            |
| 482         | Gastroenterology | Optum            |
| 1553        | Gastroenterology | Optum            |
| 480         | Gastroenterology | Optum            |
| 3340        | Gastroenterology | Optum            |
| 481         | Gastroenterology | Optum            |
| 471         | Gastroenterology | Optum            |
| 4058        | Gastroenterology | Optum            |
| 2802        | Gastroenterology | Optum            |
| 2818        | Gastroenterology | Optum            |
| 472         | Gastroenterology | Optum            |
| 4105        | Gastroenterology | Optum            |
| 485         | Gastroenterology | Optum            |
| 484         | Gastroenterology | Optum            |
| 483         | Gastroenterology | Optum            |
| 1461        | Gastroenterology | Optum            |
| 7124        | Gastroenterology | Optum            |
| 6726        | Gastroenterology | Optum            |
| 6727        | Gastroenterology | Optum            |

| <u>Code</u> | <u>Specialty</u>            | <u>Code type</u> |
|-------------|-----------------------------|------------------|
| 7693        | Gastroenterology            | Optum            |
| 7082        | Gastroenterology            | Optum            |
| 4101        | Gastroenterology            | Optum            |
| 3806        | Gastroenterology            | Optum            |
| 1391        | Gastroenterology            | Optum            |
| 5805        | Gastroenterology            | Optum            |
| 3199        | Gastroenterology            | Optum            |
| 4301        | Gastroenterology            | Optum            |
| 492         | Gastroenterology            | Optum            |
| 2283        | Gastroenterology            | Optum            |
| 487         | Gastroenterology            | Optum            |
| 486         | Gastroenterology            | Optum            |
| 488         | Gastroenterology            | Optum            |
| 6734        | Gastroenterology            | Optum            |
| 3782        | Gastroenterology            | Optum            |
| 7254        | Gastroenterology            | Optum            |
| 5943        | Gastroenterology            | Optum            |
| 489         | Gastroenterology            | Optum            |
| 2923        | Gastroenterology            | Optum            |
| 5909        | Gastroenterology            | Optum            |
| 493         | Gastroenterology            | Optum            |
| 1157        | Gastroenterology            | Optum            |
| 490         | Gastroenterology            | Optum            |
| 491         | Gastroenterology            | Optum            |
| 3604        | Gastroenterology            | Optum            |
| 3794        | Gastroenterology            | Optum            |
| 7480        | Gastroenterology            | Optum            |
| 2954        | Internal Medicine specialty | Optum            |
| 1377        | Internal Medicine specialty | Optum            |
| 5890        | Internal Medicine specialty | Optum            |
| 7101        | Internal Medicine specialty | Optum            |
| 6215        | Internal Medicine specialty | Optum            |
| 364         | Internal Medicine specialty | Optum            |
| 367         | Internal Medicine specialty | Optum            |
| 372         | Internal Medicine specialty | Optum            |
| 2863        | Internal Medicine specialty | Optum            |
| 370         | Internal Medicine specialty | Optum            |
| 1789        | Internal Medicine specialty | Optum            |
| 371         | Internal Medicine specialty | Optum            |

| <u>Code</u> | <u>Specialty</u>            | <u>Code type</u> |
|-------------|-----------------------------|------------------|
| 7381        | Internal Medicine specialty | Optum            |
| 369         | Internal Medicine specialty | Optum            |
| 6863        | Internal Medicine specialty | Optum            |
| 7109        | Internal Medicine specialty | Optum            |
| 1809        | Internal Medicine specialty | Optum            |
| 368         | Internal Medicine specialty | Optum            |
| 6178        | Internal Medicine specialty | Optum            |
| 373         | Internal Medicine specialty | Optum            |
| 6941        | Internal Medicine specialty | Optum            |
| 365         | Internal Medicine specialty | Optum            |
| 6176        | Internal Medicine specialty | Optum            |
| 1917        | Internal Medicine specialty | Optum            |
| 3635        | Internal Medicine specialty | Optum            |
| 1117        | Internal Medicine specialty | Optum            |
| 2968        | Internal Medicine specialty | Optum            |
| 6966        | Internal Medicine specialty | Optum            |
| 374         | Internal Medicine specialty | Optum            |
| 1963        | Internal Medicine specialty | Optum            |
| 3697        | Internal Medicine specialty | Optum            |
| 5868        | Internal Medicine specialty | Optum            |
| 2707        | Internal Medicine specialty | Optum            |
| 5883        | Internal Medicine specialty | Optum            |
| 7125        | Internal Medicine specialty | Optum            |
| 375         | Internal Medicine specialty | Optum            |
| 6848        | Internal Medicine specialty | Optum            |
| 7092        | Internal Medicine specialty | Optum            |
| 7108        | Internal Medicine specialty | Optum            |
| 406         | Internal Medicine specialty | Optum            |
| 403         | Internal Medicine specialty | Optum            |
| 7431        | Internal Medicine specialty | Optum            |
| 404         | Internal Medicine specialty | Optum            |
| 6708        | Internal Medicine specialty | Optum            |
| 405         | Internal Medicine specialty | Optum            |
| 6797        | Internal Medicine specialty | Optum            |
| 1473        | Internal Medicine specialty | Optum            |
| 4303        | Internal Medicine specialty | Optum            |
| 4287        | Internal Medicine specialty | Optum            |
| 7034        | Internal Medicine specialty | Optum            |
| 1363        | Internal Medicine specialty | Optum            |

| <u>Code</u> | <u>Specialty</u>            | <u>Code type</u> |
|-------------|-----------------------------|------------------|
| 1106        | Internal Medicine specialty | Optum            |
| 1108        | Internal Medicine specialty | Optum            |
| 1107        | Internal Medicine specialty | Optum            |
| 1109        | Internal Medicine specialty | Optum            |
| 2983        | Internal Medicine specialty | Optum            |
| 1641        | Internal Medicine specialty | Optum            |
| 4020        | Internal Medicine specialty | Optum            |
| 2477        | Internal Medicine specialty | Optum            |
| 6887        | Internal Medicine specialty | Optum            |
| 409         | Internal Medicine specialty | Optum            |
| 2531        | Internal Medicine specialty | Optum            |
| 1728        | Internal Medicine specialty | Optum            |
| 4187        | Internal Medicine specialty | Optum            |
| 4337        | Internal Medicine specialty | Optum            |
| 2559        | Internal Medicine specialty | Optum            |
| 5742        | Internal Medicine specialty | Optum            |
| 3186        | Internal Medicine specialty | Optum            |
| 6203        | Internal Medicine specialty | Optum            |
| 1135        | Internal Medicine specialty | Optum            |
| 2678        | Internal Medicine specialty | Optum            |
| 6296        | Internal Medicine specialty | Optum            |
| 2568        | Internal Medicine specialty | Optum            |
| 1947        | Internal Medicine specialty | Optum            |
| 3267        | Internal Medicine specialty | Optum            |
| 4653        | Internal Medicine specialty | Optum            |
| 6801        | Internal Medicine specialty | Optum            |
| 400         | Internal Medicine specialty | Optum            |
| 2751        | Internal Medicine specialty | Optum            |
| 2047        | Internal Medicine specialty | Optum            |
| 2423        | Internal Medicine specialty | Optum            |
| 2791        | Internal Medicine specialty | Optum            |
| 2082        | Internal Medicine specialty | Optum            |
| 2891        | Internal Medicine specialty | Optum            |
| 3848        | Internal Medicine specialty | Optum            |
| 407         | Internal Medicine specialty | Optum            |
| 5761        | Internal Medicine specialty | Optum            |
| 408         | Internal Medicine specialty | Optum            |
| 413         | Internal Medicine specialty | Optum            |
| 3137        | Internal Medicine specialty | Optum            |

| <u>Code</u> | <u>Specialty</u>            | <u>Code type</u> |
|-------------|-----------------------------|------------------|
| 5726        | Internal Medicine specialty | Optum            |
| 4644        | Internal Medicine specialty | Optum            |
| 2653        | Internal Medicine specialty | Optum            |
| 1856        | Internal Medicine specialty | Optum            |
| 7420        | Internal Medicine specialty | Optum            |
| 5771        | Internal Medicine specialty | Optum            |
| 6493        | Internal Medicine specialty | Optum            |
| 6858        | Internal Medicine specialty | Optum            |
| 7652        | Internal Medicine specialty | Optum            |
| 3818        | Internal Medicine specialty | Optum            |
| 2957        | Internal Medicine specialty | Optum            |
| 411         | Internal Medicine specialty | Optum            |
| 3259        | Internal Medicine specialty | Optum            |
| 3394        | Internal Medicine specialty | Optum            |
| 3534        | Internal Medicine specialty | Optum            |
| 3928        | Internal Medicine specialty | Optum            |
| 2810        | Internal Medicine specialty | Optum            |
| 4120        | Internal Medicine specialty | Optum            |
| 1123        | Internal Medicine specialty | Optum            |
| 414         | Internal Medicine specialty | Optum            |
| 402         | Internal Medicine specialty | Optum            |
| 2854        | Internal Medicine specialty | Optum            |
| 6643        | Internal Medicine specialty | Optum            |
| 1757        | Internal Medicine specialty | Optum            |
| 410         | Internal Medicine specialty | Optum            |
| 412         | Internal Medicine specialty | Optum            |
| 7028        | Internal Medicine specialty | Optum            |
| 1745        | Internal Medicine specialty | Optum            |
| 3108        | Internal Medicine specialty | Optum            |
| 2804        | Internal Medicine specialty | Optum            |
| 4163        | Internal Medicine specialty | Optum            |
| 1561        | Internal Medicine specialty | Optum            |
| 417         | Internal Medicine specialty | Optum            |
| 6058        | Internal Medicine specialty | Optum            |
| 415         | Internal Medicine specialty | Optum            |
| 7649        | Internal Medicine specialty | Optum            |
| 5913        | Internal Medicine specialty | Optum            |
| 5949        | Internal Medicine specialty | Optum            |
| 401         | Internal Medicine specialty | Optum            |



| <u>Code</u> | <u>Specialty</u>            | <u>Code type</u> |
|-------------|-----------------------------|------------------|
| 3073        | Internal Medicine specialty | Optum            |
| 416         | Internal Medicine specialty | Optum            |
| 1281        | Internal Medicine specialty | Optum            |
| 377         | Internal Medicine specialty | Optum            |
| 376         | Internal Medicine specialty | Optum            |
| 378         | Internal Medicine specialty | Optum            |
| 6682        | Internal Medicine specialty | Optum            |
| 4111        | Internal Medicine specialty | Optum            |
| 366         | Internal Medicine specialty | Optum            |
| 6845        | Internal Medicine specialty | Optum            |
| 4160        | Internal Medicine specialty | Optum            |
| 5775        | Internal Medicine specialty | Optum            |
| 1143        | Internal Medicine specialty | Optum            |
| 1747        | Internal Medicine specialty | Optum            |
| 459         | Internal Medicine specialty | Optum            |
| 461         | Internal Medicine specialty | Optum            |
| 3238        | Internal Medicine specialty | Optum            |
| 2365        | Internal Medicine specialty | Optum            |
| 7338        | Internal Medicine specialty | Optum            |
| 3626        | Internal Medicine specialty | Optum            |
| 2597        | Internal Medicine specialty | Optum            |
| 460         | Internal Medicine specialty | Optum            |
| 462         | Internal Medicine specialty | Optum            |
| 2800        | Internal Medicine specialty | Optum            |
| 5853        | Internal Medicine specialty | Optum            |
| 2740        | Internal Medicine specialty | Optum            |
| 2860        | Internal Medicine specialty | Optum            |
| 3986        | Internal Medicine specialty | Optum            |
| 1959        | Internal Medicine specialty | Optum            |
| 1824        | Internal Medicine specialty | Optum            |
| 464         | Internal Medicine specialty | Optum            |
| 1923        | Internal Medicine specialty | Optum            |
| 1429        | Internal Medicine specialty | Optum            |
| 5900        | Internal Medicine specialty | Optum            |
| 2532        | Internal Medicine specialty | Optum            |
| 458         | Internal Medicine specialty | Optum            |
| 3077        | Internal Medicine specialty | Optum            |
| 6534        | Internal Medicine specialty | Optum            |
| 3589        | Internal Medicine specialty | Optum            |

| <u>Code</u> | <u>Specialty</u>            | <u>Code type</u> |
|-------------|-----------------------------|------------------|
| 6667        | Internal Medicine specialty | Optum            |
| 2704        | Internal Medicine specialty | Optum            |
| 2499        | Internal Medicine specialty | Optum            |
| 5916        | Internal Medicine specialty | Optum            |
| 463         | Internal Medicine specialty | Optum            |
| 5107        | Internal Medicine specialty | Optum            |
| 2055        | Internal Medicine specialty | Optum            |
| 2578        | Internal Medicine specialty | Optum            |
| 6654        | Internal Medicine specialty | Optum            |
| 465         | Internal Medicine specialty | Optum            |
| 561         | Internal Medicine specialty | Optum            |
| 6713        | Internal Medicine specialty | Optum            |
| 6739        | Internal Medicine specialty | Optum            |
| 563         | Internal Medicine specialty | Optum            |
| 5927        | Internal Medicine specialty | Optum            |
| 6436        | Internal Medicine specialty | Optum            |
| 1315        | Internal Medicine specialty | Optum            |
| 562         | Internal Medicine specialty | Optum            |
| 554         | Internal Medicine specialty | Optum            |
| 5729        | Internal Medicine specialty | Optum            |
| 2099        | Internal Medicine specialty | Optum            |
| 565         | Internal Medicine specialty | Optum            |
| 2609        | Internal Medicine specialty | Optum            |
| 7060        | Internal Medicine specialty | Optum            |
| 6988        | Internal Medicine specialty | Optum            |
| 6805        | Internal Medicine specialty | Optum            |
| 3385        | Internal Medicine specialty | Optum            |
| 1942        | Internal Medicine specialty | Optum            |
| 1711        | Internal Medicine specialty | Optum            |
| 5759        | Internal Medicine specialty | Optum            |
| 5810        | Internal Medicine specialty | Optum            |
| 4149        | Internal Medicine specialty | Optum            |
| 2670        | Internal Medicine specialty | Optum            |
| 564         | Internal Medicine specialty | Optum            |
| 6954        | Internal Medicine specialty | Optum            |
| 2084        | Internal Medicine specialty | Optum            |
| 566         | Internal Medicine specialty | Optum            |
| 7013        | Internal Medicine specialty | Optum            |
| 555         | Internal Medicine specialty | Optum            |

| <u>Code</u> | <u>Specialty</u>            | <u>Code type</u> |
|-------------|-----------------------------|------------------|
| 1267        | Internal Medicine specialty | Optum            |
| 1937        | Internal Medicine specialty | Optum            |
| 2603        | Internal Medicine specialty | Optum            |
| 6042        | Internal Medicine specialty | Optum            |
| 6723        | Internal Medicine specialty | Optum            |
| 2420        | Internal Medicine specialty | Optum            |
| 2288        | Internal Medicine specialty | Optum            |
| 556         | Internal Medicine specialty | Optum            |
| 5760        | Internal Medicine specialty | Optum            |
| 6271        | Internal Medicine specialty | Optum            |
| 3417        | Internal Medicine specialty | Optum            |
| 3501        | Internal Medicine specialty | Optum            |
| 1835        | Internal Medicine specialty | Optum            |
| 2783        | Internal Medicine specialty | Optum            |
| 2782        | Internal Medicine specialty | Optum            |
| 6019        | Internal Medicine specialty | Optum            |
| 7335        | Internal Medicine specialty | Optum            |
| 5784        | Internal Medicine specialty | Optum            |
| 567         | Internal Medicine specialty | Optum            |
| 3465        | Internal Medicine specialty | Optum            |
| 6897        | Internal Medicine specialty | Optum            |
| 3558        | Internal Medicine specialty | Optum            |
| 1926        | Internal Medicine specialty | Optum            |
| 1543        | Internal Medicine specialty | Optum            |
| 2414        | Internal Medicine specialty | Optum            |
| 569         | Internal Medicine specialty | Optum            |
| 568         | Internal Medicine specialty | Optum            |
| 380         | Internal Medicine specialty | Optum            |
| 379         | Internal Medicine specialty | Optum            |
| 3346        | Internal Medicine specialty | Optum            |
| 381         | Internal Medicine specialty | Optum            |
| 385         | Internal Medicine specialty | Optum            |
| 7512        | Internal Medicine specialty | Optum            |
| 1439        | Internal Medicine specialty | Optum            |
| 7245        | Internal Medicine specialty | Optum            |
| 3943        | Internal Medicine specialty | Optum            |
| 6674        | Internal Medicine specialty | Optum            |
| 1768        | Internal Medicine specialty | Optum            |
| 2709        | Internal Medicine specialty | Optum            |

| <u>Code</u> | <u>Specialty</u>            | <u>Code type</u> |
|-------------|-----------------------------|------------------|
| 587         | Internal Medicine specialty | Optum            |
| 3623        | Internal Medicine specialty | Optum            |
| 3489        | Internal Medicine specialty | Optum            |
| 588         | Internal Medicine specialty | Optum            |
| 3491        | Internal Medicine specialty | Optum            |
| 1892        | Internal Medicine specialty | Optum            |
| 585         | Internal Medicine specialty | Optum            |
| 7500        | Internal Medicine specialty | Optum            |
| 3310        | Internal Medicine specialty | Optum            |
| 7344        | Internal Medicine specialty | Optum            |
| 6031        | Internal Medicine specialty | Optum            |
| 6940        | Internal Medicine specialty | Optum            |
| 1930        | Internal Medicine specialty | Optum            |
| 2515        | Internal Medicine specialty | Optum            |
| 6025        | Internal Medicine specialty | Optum            |
| 586         | Internal Medicine specialty | Optum            |
| 5811        | Internal Medicine specialty | Optum            |
| 3500        | Internal Medicine specialty | Optum            |
| 6650        | Internal Medicine specialty | Optum            |
| 2595        | Internal Medicine specialty | Optum            |
| 1249        | Internal Medicine specialty | Optum            |
| 5817        | Internal Medicine specialty | Optum            |
| 2115        | Internal Medicine specialty | Optum            |
| 7326        | Internal Medicine specialty | Optum            |
| 6664        | Internal Medicine specialty | Optum            |
| 4622        | Internal Medicine specialty | Optum            |
| 6378        | Internal Medicine specialty | Optum            |
| 1212        | Internal Medicine specialty | Optum            |
| 6616        | Internal Medicine specialty | Optum            |
| 6380        | Internal Medicine specialty | Optum            |
| 1629        | Internal Medicine specialty | Optum            |
| 6553        | Internal Medicine specialty | Optum            |
| 3925        | Internal Medicine specialty | Optum            |
| 1582        | Internal Medicine specialty | Optum            |
| 7362        | Internal Medicine specialty | Optum            |
| 3800        | Internal Medicine specialty | Optum            |
| 4621        | Internal Medicine specialty | Optum            |
| 1162        | Internal Medicine specialty | Optum            |
| 6593        | Internal Medicine specialty | Optum            |

| <u>Code</u> | <u>Specialty</u>            | <u>Code type</u> |
|-------------|-----------------------------|------------------|
| 6787        | Internal Medicine specialty | Optum            |
| 7262        | Internal Medicine specialty | Optum            |
| 3709        | Internal Medicine specialty | Optum            |
| 7036        | Internal Medicine specialty | Optum            |
| 571         | Internal Medicine specialty | Optum            |
| 3631        | Internal Medicine specialty | Optum            |
| 582         | Internal Medicine specialty | Optum            |
| 7526        | Internal Medicine specialty | Optum            |
| 1687        | Internal Medicine specialty | Optum            |
| 5699        | Internal Medicine specialty | Optum            |
| 7541        | Internal Medicine specialty | Optum            |
| 6829        | Internal Medicine specialty | Optum            |
| 5815        | Internal Medicine specialty | Optum            |
| 572         | Internal Medicine specialty | Optum            |
| 3322        | Internal Medicine specialty | Optum            |
| 6802        | Internal Medicine specialty | Optum            |
| 1863        | Internal Medicine specialty | Optum            |
| 7673        | Internal Medicine specialty | Optum            |
| 1213        | Internal Medicine specialty | Optum            |
| 2833        | Internal Medicine specialty | Optum            |
| 2429        | Internal Medicine specialty | Optum            |
| 570         | Internal Medicine specialty | Optum            |
| 2523        | Internal Medicine specialty | Optum            |
| 1762        | Internal Medicine specialty | Optum            |
| 2325        | Internal Medicine specialty | Optum            |
| 1812        | Internal Medicine specialty | Optum            |
| 2784        | Internal Medicine specialty | Optum            |
| 4169        | Internal Medicine specialty | Optum            |
| 574         | Internal Medicine specialty | Optum            |
| 573         | Internal Medicine specialty | Optum            |
| 1539        | Internal Medicine specialty | Optum            |
| 557         | Internal Medicine specialty | Optum            |
| 3781        | Internal Medicine specialty | Optum            |
| 575         | Internal Medicine specialty | Optum            |
| 4094        | Internal Medicine specialty | Optum            |
| 7653        | Internal Medicine specialty | Optum            |
| 2813        | Internal Medicine specialty | Optum            |
| 597         | Internal Medicine specialty | Optum            |
| 1698        | Internal Medicine specialty | Optum            |

| <u>Code</u> | <u>Specialty</u>            | <u>Code type</u> |
|-------------|-----------------------------|------------------|
| 599         | Internal Medicine specialty | Optum            |
| 2851        | Internal Medicine specialty | Optum            |
| 5847        | Internal Medicine specialty | Optum            |
| 6703        | Internal Medicine specialty | Optum            |
| 3785        | Internal Medicine specialty | Optum            |
| 1179        | Internal Medicine specialty | Optum            |
| 7081        | Internal Medicine specialty | Optum            |
| 3171        | Internal Medicine specialty | Optum            |
| 5690        | Internal Medicine specialty | Optum            |
| 2669        | Internal Medicine specialty | Optum            |
| 7620        | Internal Medicine specialty | Optum            |
| 2026        | Internal Medicine specialty | Optum            |
| 600         | Internal Medicine specialty | Optum            |
| 6995        | Internal Medicine specialty | Optum            |
| 2545        | Internal Medicine specialty | Optum            |
| 4251        | Internal Medicine specialty | Optum            |
| 6187        | Internal Medicine specialty | Optum            |
| 3636        | Internal Medicine specialty | Optum            |
| 7382        | Internal Medicine specialty | Optum            |
| 2815        | Internal Medicine specialty | Optum            |
| 6888        | Internal Medicine specialty | Optum            |
| 5846        | Internal Medicine specialty | Optum            |
| 2021        | Internal Medicine specialty | Optum            |
| 598         | Internal Medicine specialty | Optum            |
| 4239        | Internal Medicine specialty | Optum            |
| 7651        | Internal Medicine specialty | Optum            |
| 3854        | Internal Medicine specialty | Optum            |
| 6785        | Internal Medicine specialty | Optum            |
| 6867        | Internal Medicine specialty | Optum            |
| 4113        | Internal Medicine specialty | Optum            |
| 6839        | Internal Medicine specialty | Optum            |
| 6825        | Internal Medicine specialty | Optum            |
| 3249        | Internal Medicine specialty | Optum            |
| 6097        | Internal Medicine specialty | Optum            |
| 3692        | Internal Medicine specialty | Optum            |
| 6784        | Internal Medicine specialty | Optum            |
| 4001        | Internal Medicine specialty | Optum            |
| 2715        | Internal Medicine specialty | Optum            |
| 5719        | Internal Medicine specialty | Optum            |

| <u>Code</u> | <u>Specialty</u>            | <u>Code type</u> |
|-------------|-----------------------------|------------------|
| 3010        | Internal Medicine specialty | Optum            |
| 4380        | Internal Medicine specialty | Optum            |
| 3703        | Internal Medicine specialty | Optum            |
| 3665        | Internal Medicine specialty | Optum            |
| 1816        | Internal Medicine specialty | Optum            |
| 2642        | Internal Medicine specialty | Optum            |
| 1159        | Internal Medicine specialty | Optum            |
| 1970        | Internal Medicine specialty | Optum            |
| 892         | Internal Medicine specialty | Optum            |
| 3919        | Internal Medicine specialty | Optum            |
| 2243        | Internal Medicine specialty | Optum            |
| 3198        | Internal Medicine specialty | Optum            |
| 894         | Internal Medicine specialty | Optum            |
| 3451        | Internal Medicine specialty | Optum            |
| 885         | Internal Medicine specialty | Optum            |
| 5737        | Internal Medicine specialty | Optum            |
| 7098        | Internal Medicine specialty | Optum            |
| 893         | Internal Medicine specialty | Optum            |
| 6118        | Internal Medicine specialty | Optum            |
| 6153        | Internal Medicine specialty | Optum            |
| 3299        | Internal Medicine specialty | Optum            |
| 3300        | Internal Medicine specialty | Optum            |
| 3258        | Internal Medicine specialty | Optum            |
| 4255        | Internal Medicine specialty | Optum            |
| 3573        | Internal Medicine specialty | Optum            |
| 6590        | Internal Medicine specialty | Optum            |
| 3710        | Internal Medicine specialty | Optum            |
| 5840        | Internal Medicine specialty | Optum            |
| 5602        | Internal Medicine specialty | Optum            |
| 1955        | Internal Medicine specialty | Optum            |
| 940         | Internal Medicine specialty | Optum            |
| 941         | Internal Medicine specialty | Optum            |
| 1901        | Internal Medicine specialty | Optum            |
| 2774        | Internal Medicine specialty | Optum            |
| 2625        | Internal Medicine specialty | Optum            |
| 3497        | Internal Medicine specialty | Optum            |
| 1656        | Internal Medicine specialty | Optum            |
| 939         | Internal Medicine specialty | Optum            |
| 3924        | Internal Medicine specialty | Optum            |

| <u>Code</u> | <u>Specialty</u>            | <u>Code type</u> |
|-------------|-----------------------------|------------------|
| 1263        | Internal Medicine specialty | Optum            |
| 3853        | Internal Medicine specialty | Optum            |
| 3695        | Internal Medicine specialty | Optum            |
| 935         | Internal Medicine specialty | Optum            |
| 4203        | Internal Medicine specialty | Optum            |
| 5850        | Internal Medicine specialty | Optum            |
| 3699        | Internal Medicine specialty | Optum            |
| 334         | Primary care                | Optum            |
| 4876        | Primary care                | Optum            |
| 336         | Primary care                | Optum            |
| 2302        | Primary care                | Optum            |
| 3755        | Primary care                | Optum            |
| 6642        | Primary care                | Optum            |
| 7152        | Primary care                | Optum            |
| 1726        | Primary care                | Optum            |
| 7050        | Primary care                | Optum            |
| 7180        | Primary care                | Optum            |
| 1419        | Primary care                | Optum            |
| 5998        | Primary care                | Optum            |
| 4825        | Primary care                | Optum            |
| 342         | Primary care                | Optum            |
| 7545        | Primary care                | Optum            |
| 3268        | Primary care                | Optum            |
| 337         | Primary care                | Optum            |
| 1764        | Primary care                | Optum            |
| 7079        | Primary care                | Optum            |
| 5829        | Primary care                | Optum            |
| 7182        | Primary care                | Optum            |
| 4830        | Primary care                | Optum            |
| 335         | Primary care                | Optum            |
| 2485        | Primary care                | Optum            |
| 3564        | Primary care                | Optum            |
| 5873        | Primary care                | Optum            |
| 2672        | Primary care                | Optum            |
| 5086        | Primary care                | Optum            |
| 7497        | Primary care                | Optum            |
| 821         | Primary care                | Optum            |
| 7136        | Primary care                | Optum            |
| 7579        | Primary care                | Optum            |



| <u>Code</u> | <u>Specialty</u> | <u>Code type</u> |
|-------------|------------------|------------------|
| 2321        | Primary care     | Optum            |
| 7631        | Primary care     | Optum            |
| 1183        | Primary care     | Optum            |
| 816         | Primary care     | Optum            |
| 820         | Primary care     | Optum            |
| 822         | Primary care     | Optum            |
| 7065        | Primary care     | Optum            |
| 1744        | Primary care     | Optum            |
| 1570        | Primary care     | Optum            |
| 312         | Primary care     | Optum            |
| 7017        | Primary care     | Optum            |
| 1423        | Primary care     | Optum            |
| 311         | Primary care     | Optum            |
| 313         | Primary care     | Optum            |
| 4331        | Primary care     | Optum            |
| 2208        | Primary care     | Optum            |
| 2068        | Primary care     | Optum            |
| 315         | Primary care     | Optum            |
| 7091        | Primary care     | Optum            |
| 3765        | Primary care     | Optum            |
| 5706        | Primary care     | Optum            |
| 7106        | Primary care     | Optum            |
| 314         | Primary care     | Optum            |
| 7741        | Primary care     | Optum            |
| 4333        | Primary care     | Optum            |
| 5774        | Primary care     | Optum            |
| 2254        | Primary care     | Optum            |
| 3702        | Primary care     | Optum            |
| 1046        | Primary care     | Optum            |
| 316         | Primary care     | Optum            |
| 4206        | Primary care     | Optum            |
| 1755        | Primary care     | Optum            |
| 3413        | Primary care     | Optum            |
| 2614        | Primary care     | Optum            |
| 2286        | Primary care     | Optum            |
| 3350        | Primary care     | Optum            |
| 2615        | Primary care     | Optum            |
| 2340        | Primary care     | Optum            |
| 2904        | Primary care     | Optum            |

| <u>Code</u> | <u>Specialty</u> | <u>Code type</u> |
|-------------|------------------|------------------|
| 4362        | Primary care     | Optum            |
| 2677        | Primary care     | Optum            |
| 2613        | Primary care     | Optum            |
| 4648        | Primary care     | Optum            |
| 1127        | Primary care     | Optum            |
| 1785        | Primary care     | Optum            |
| 1646        | Primary care     | Optum            |
| 318         | Primary care     | Optum            |
| 5994        | Primary care     | Optum            |
| 2644        | Primary care     | Optum            |
| 2375        | Primary care     | Optum            |
| 1643        | Primary care     | Optum            |
| 1661        | Primary care     | Optum            |
| 2233        | Primary care     | Optum            |
| 3150        | Primary care     | Optum            |
| 1790        | Primary care     | Optum            |
| 2978        | Primary care     | Optum            |
| 2790        | Primary care     | Optum            |
| 2324        | Primary care     | Optum            |
| 2219        | Primary care     | Optum            |
| 1903        | Primary care     | Optum            |
| 5063        | Primary care     | Optum            |
| 5696        | Primary care     | Optum            |
| 2403        | Primary care     | Optum            |
| 5683        | Primary care     | Optum            |
| 317         | Primary care     | Optum            |
| 2446        | Primary care     | Optum            |
| 308         | Primary care     | Optum            |
| 1854        | Primary care     | Optum            |
| 2354        | Primary care     | Optum            |
| 319         | Primary care     | Optum            |
| 4135        | Primary care     | Optum            |
| 1433        | Primary care     | Optum            |
| 321         | Primary care     | Optum            |
| 322         | Primary care     | Optum            |
| 309         | Primary care     | Optum            |
| 320         | Primary care     | Optum            |
| 323         | Primary care     | Optum            |
| 325         | Primary care     | Optum            |

| <u>Code</u> | <u>Specialty</u> | <u>Code type</u> |
|-------------|------------------|------------------|
| 1431        | Primary care     | Optum            |
| 310         | Primary care     | Optum            |
| 324         | Primary care     | Optum            |
| 2073        | Primary care     | Optum            |
| 5717        | Primary care     | Optum            |
| 6589        | Primary care     | Optum            |
| 5919        | Primary care     | Optum            |
| 7443        | Primary care     | Optum            |
| 326         | Primary care     | Optum            |
| 327         | Primary care     | Optum            |
| 7138        | Primary care     | Optum            |
| 1417        | Primary care     | Optum            |
| 333         | Primary care     | Optum            |
| 3787        | Primary care     | Optum            |
| 7555        | Primary care     | Optum            |
| 328         | Primary care     | Optum            |
| 4645        | Primary care     | Optum            |
| 1865        | Primary care     | Optum            |
| 3777        | Primary care     | Optum            |
| 2736        | Primary care     | Optum            |
| 5732        | Primary care     | Optum            |
| 1927        | Primary care     | Optum            |
| 2359        | Primary care     | Optum            |
| 1694        | Primary care     | Optum            |
| 1832        | Primary care     | Optum            |
| 2378        | Primary care     | Optum            |
| 2837        | Primary care     | Optum            |
| 2811        | Primary care     | Optum            |
| 332         | Primary care     | Optum            |
| 1721        | Primary care     | Optum            |
| 329         | Primary care     | Optum            |
| 2628        | Primary care     | Optum            |
| 3094        | Primary care     | Optum            |
| 3812        | Primary care     | Optum            |
| 330         | Primary care     | Optum            |
| 331         | Primary care     | Optum            |
| 2826        | Primary care     | Optum            |
| 3317        | Primary care     | Optum            |
| 2189        | Primary care     | Optum            |

| <u>Code</u> | <u>Specialty</u> | <u>Code type</u> |
|-------------|------------------|------------------|
| 2574        | Primary care     | Optum            |
| 1940        | Primary care     | Optum            |
| 2996        | Primary care     | Optum            |
| 3122        | Primary care     | Optum            |
| 2889        | Primary care     | Optum            |
| 2930        | Primary care     | Optum            |
| 6000        | Primary care     | Optum            |
| 2835        | Primary care     | Optum            |
| 1791        | Primary care     | Optum            |
| 7592        | Primary care     | Optum            |
| 5781        | Primary care     | Optum            |
| 1113        | Primary care     | Optum            |
| 3779        | Primary care     | Optum            |
| 4044        | Primary care     | Optum            |
| 6788        | Primary care     | Optum            |
| 825         | Primary care     | Optum            |
| 3894        | Primary care     | Optum            |
| 6653        | Primary care     | Optum            |
| 1435        | Primary care     | Optum            |
| 6948        | Primary care     | Optum            |
| 6659        | Primary care     | Optum            |
| 6666        | Primary care     | Optum            |
| 7660        | Primary care     | Optum            |
| 7266        | Primary care     | Optum            |
| 7654        | Primary care     | Optum            |
| 7496        | Primary care     | Optum            |
| 2554        | Primary care     | Optum            |
| 6121        | Primary care     | Optum            |
| 4162        | Primary care     | Optum            |
| 823         | Primary care     | Optum            |
| 817         | Primary care     | Optum            |
| 7228        | Primary care     | Optum            |
| 824         | Primary care     | Optum            |
| 6100        | Primary care     | Optum            |
| 2739        | Primary care     | Optum            |
| 551         | Primary care     | Optum            |
| 3304        | Primary care     | Optum            |
| 2329        | Primary care     | Optum            |
| 2674        | Primary care     | Optum            |

| <u>Code</u> | <u>Specialty</u> | <u>Code type</u> |
|-------------|------------------|------------------|
| 3574        | Primary care     | Optum            |
| 3957        | Primary care     | Optum            |
| 5783        | Primary care     | Optum            |
| 2733        | Primary care     | Optum            |
| 552         | Primary care     | Optum            |
| 1840        | Primary care     | Optum            |
| 3081        | Primary care     | Optum            |
| 1177        | Primary care     | Optum            |
| 3847        | Primary care     | Optum            |
| 4153        | Primary care     | Optum            |
| 1997        | Primary care     | Optum            |
| 2661        | Primary care     | Optum            |
| 3093        | Primary care     | Optum            |
| 550         | Primary care     | Optum            |
| 549         | Primary care     | Optum            |
| 3537        | Primary care     | Optum            |
| 5778        | Primary care     | Optum            |
| 4404        | Primary care     | Optum            |
| 4207        | Primary care     | Optum            |
| 2280        | Primary care     | Optum            |
| 2050        | Primary care     | Optum            |
| 2373        | Primary care     | Optum            |
| 3241        | Primary care     | Optum            |
| 2384        | Primary care     | Optum            |
| 3041        | Primary care     | Optum            |
| 6685        | Primary care     | Optum            |
| 1697        | Primary care     | Optum            |
| 6379        | Primary care     | Optum            |
| 340         | Primary care     | Optum            |
| 2658        | Primary care     | Optum            |
| 2610        | Primary care     | Optum            |
| 2314        | Primary care     | Optum            |
| 5991        | Primary care     | Optum            |
| 1864        | Primary care     | Optum            |
| 341         | Primary care     | Optum            |
| 2313        | Primary care     | Optum            |
| 338         | Primary care     | Optum            |
| 2228        | Primary care     | Optum            |
| 339         | Primary care     | Optum            |

| <u>Code</u> | <u>Specialty</u> | <u>Code type</u> |
|-------------|------------------|------------------|
| 4641        | Primary care     | Optum            |
| 2842        | Primary care     | Optum            |
| 2630        | Primary care     | Optum            |
| 2607        | Primary care     | Optum            |
| 5724        | Primary care     | Optum            |
| 5736        | Primary care     | Optum            |
| 1133        | Primary care     | Optum            |
| 1673        | Primary care     | Optum            |
| 3817        | Primary care     | Optum            |
| 2392        | Primary care     | Optum            |
| 2249        | Primary care     | Optum            |
| 1860        | Primary care     | Optum            |
| 3531        | Primary care     | Optum            |
| 1743        | Primary care     | Optum            |
| 3650        | Primary care     | Optum            |
| 1719        | Primary care     | Optum            |
| 827         | Primary care     | Optum            |
| 3801        | Primary care     | Optum            |
| 818         | Primary care     | Optum            |
| 5906        | Primary care     | Optum            |
| 5938        | Primary care     | Optum            |
| 828         | Primary care     | Optum            |
| 826         | Primary care     | Optum            |
| 1349        | Primary care     | Optum            |
| 4182        | Primary care     | Optum            |
| 6971        | Primary care     | Optum            |
| 831         | Primary care     | Optum            |
| 819         | Primary care     | Optum            |
| 7489        | Primary care     | Optum            |
| 829         | Primary care     | Optum            |
| 7217        | Primary care     | Optum            |
| 6721        | Primary care     | Optum            |
| 7525        | Primary care     | Optum            |
| 830         | Primary care     | Optum            |
| 7467        | Primary care     | Optum            |
| 7248        | Primary care     | Optum            |
| 7368        | Primary care     | Optum            |
| 4049        | Primary care     | Optum            |
| 7318        | Primary care     | Optum            |

| <u>Code</u> | <u>Specialty</u> | <u>Code type</u> |
|-------------|------------------|------------------|
| 7416        | Primary care     | Optum            |
| 3193        | Primary care     | Optum            |
| 7020        | Primary care     | Optum            |
| 7537        | Primary care     | Optum            |
| 7523        | Primary care     | Optum            |
| 1345        | Primary care     | Optum            |
| 7599        | Primary care     | Optum            |
| 6771        | Primary care     | Optum            |
| 1515        | Primary care     | Optum            |
| 832         | Primary care     | Optum            |
| 7432        | Primary care     | Optum            |
| 6617        | Primary care     | Optum            |
| 6799        | Primary care     | Optum            |
| 5933        | Primary care     | Optum            |
| 833         | Primary care     | Optum            |
| 835         | Primary care     | Optum            |
| 834         | Primary care     | Optum            |
| 7105        | Primary care     | Optum            |

**Supplemental table 4. Upper gastrointestinal malignancy risk factors/signs codes**

| <u>Code</u> | <u>Description</u>          | <u>Code type</u> |
|-------------|-----------------------------|------------------|
| V160        | Family history of GI cancer | ICD9             |
| Z800        | Family history of GI cancer | ICD10            |
| 27800       | Obesity                     | ICD9             |
| 27801       | Obesity                     | ICD9             |
| 27803       | Obesity                     | ICD9             |
| V8530       | Obesity                     | ICD9             |
| V8531       | Obesity                     | ICD9             |
| V8532       | Obesity                     | ICD9             |
| V8533       | Obesity                     | ICD9             |
| V8534       | Obesity                     | ICD9             |
| V8535       | Obesity                     | ICD9             |
| V8536       | Obesity                     | ICD9             |
| V8537       | Obesity                     | ICD9             |
| V8538       | Obesity                     | ICD9             |
| V8539       | Obesity                     | ICD9             |
| V8541       | Obesity                     | ICD9             |
| V8542       | Obesity                     | ICD9             |
| V8543       | Obesity                     | ICD9             |
| V8544       | Obesity                     | ICD9             |
| V8545       | Obesity                     | ICD9             |
| E6601       | Obesity                     | ICD10            |
| E662        | Obesity                     | ICD10            |
| Z6830       | Obesity                     | ICD10            |
| Z6831       | Obesity                     | ICD10            |
| Z6832       | Obesity                     | ICD10            |
| Z6833       | Obesity                     | ICD10            |
| Z6834       | Obesity                     | ICD10            |
| Z6835       | Obesity                     | ICD10            |
| Z6836       | Obesity                     | ICD10            |
| Z6837       | Obesity                     | ICD10            |
| Z6838       | Obesity                     | ICD10            |
| Z6839       | Obesity                     | ICD10            |
| Z6841       | Obesity                     | ICD10            |
| Z6842       | Obesity                     | ICD10            |
| Z6843       | Obesity                     | ICD10            |
| Z6844       | Obesity                     | ICD10            |
| Z6845       | Obesity                     | ICD10            |



| <u>Code</u> | <u>Description</u> | <u>Code type</u> |
|-------------|--------------------|------------------|
| 3051        | Tobacco use        | ICD9             |
| V1582       | Tobacco use        | ICD9             |
| F17200      | Tobacco use        | ICD10            |
| F17201      | Tobacco use        | ICD10            |
| F17203      | Tobacco use        | ICD10            |
| F17208      | Tobacco use        | ICD10            |
| F17209      | Tobacco use        | ICD10            |
| F17210      | Tobacco use        | ICD10            |
| F17211      | Tobacco use        | ICD10            |
| F17213      | Tobacco use        | ICD10            |
| F17218      | Tobacco use        | ICD10            |
| F17219      | Tobacco use        | ICD10            |
| F17220      | Tobacco use        | ICD10            |
| F17221      | Tobacco use        | ICD10            |
| F17223      | Tobacco use        | ICD10            |
| F17228      | Tobacco use        | ICD10            |
| F17229      | Tobacco use        | ICD10            |
| F17290      | Tobacco use        | ICD10            |
| F17291      | Tobacco use        | ICD10            |
| F17293      | Tobacco use        | ICD10            |
| F17298      | Tobacco use        | ICD10            |
| F17299      | Tobacco use        | ICD10            |
| Z87891      | Tobacco use        | ICD10            |

**Supplemental table 5. Gastrointestinal signs/symptoms codes**

| <u>Code</u> | <u>Description</u> | <u>Code type</u> |
|-------------|--------------------|------------------|
| 78900       | Abdominal pain     | ICD9             |
| 78901       | Abdominal pain     | ICD9             |
| 78902       | Abdominal pain     | ICD9             |
| 78903       | Abdominal pain     | ICD9             |
| 78904       | Abdominal pain     | ICD9             |
| 78905       | Abdominal pain     | ICD9             |
| 78906       | Abdominal pain     | ICD9             |
| 78907       | Abdominal pain     | ICD9             |
| 78909       | Abdominal pain     | ICD9             |
| R1010       | Abdominal pain     | ICD10            |
| R1011       | Abdominal pain     | ICD10            |
| R1012       | Abdominal pain     | ICD10            |
| R1013       | Abdominal pain     | ICD10            |
| R1030       | Abdominal pain     | ICD10            |
| R1031       | Abdominal pain     | ICD10            |
| R1032       | Abdominal pain     | ICD10            |
| R1033       | Abdominal pain     | ICD10            |
| R1084       | Abdominal pain     | ICD10            |
| R109        | Abdominal pain     | ICD10            |
| 5645        | Diarrhea           | ICD9             |
| 0092        | Diarrhea           | ICD9             |
| 0093        | Diarrhea           | ICD9             |
| 78791       | Diarrhea           | ICD9             |
| K591        | Diarrhea           | ICD10            |
| A09         | Diarrhea           | ICD10            |
| R197        | Diarrhea           | ICD10            |
| 78720       | Dysphagia          | ICD9             |
| 78721       | Dysphagia          | ICD9             |
| 78722       | Dysphagia          | ICD9             |
| 78723       | Dysphagia          | ICD9             |
| 78724       | Dysphagia          | ICD9             |
| 78729       | Dysphagia          | ICD9             |
| R1310       | Dysphagia          | ICD10            |
| R1311       | Dysphagia          | ICD10            |
| R1312       | Dysphagia          | ICD10            |
| R1313       | Dysphagia          | ICD10            |
| R1314       | Dysphagia          | ICD10            |

| <u>Code</u> | <u>Description</u>     | <u>Code type</u> |
|-------------|------------------------|------------------|
| R1319       | Dysphagia              | ICD10            |
| 78701       | Nausea and vomiting    | ICD9             |
| 78702       | Nausea and vomiting    | ICD9             |
| 78703       | Nausea and vomiting    | ICD9             |
| 78704       | Nausea and vomiting    | ICD9             |
| R110        | Nausea and vomiting    | ICD10            |
| R1110       | Nausea and vomiting    | ICD10            |
| R1111       | Nausea and vomiting    | ICD10            |
| R1112       | Nausea and vomiting    | ICD10            |
| R1113       | Nausea and vomiting    | ICD10            |
| R1114       | Nausea and vomiting    | ICD10            |
| R1115       | Nausea and vomiting    | ICD10            |
| R112        | Nausea and vomiting    | ICD10            |
| 5693        | Melena/rectal bleeding | ICD9             |
| 5781        | Melena/rectal bleeding | ICD9             |
| 5789        | Melena/rectal bleeding | ICD9             |
| K625        | Melena/rectal bleeding | ICD10            |
| K921        | Melena/rectal bleeding | ICD10            |
| K922        | Melena/rectal bleeding | ICD10            |
| 260         | Weight loss            | ICD9             |
| 261         | Weight loss            | ICD9             |
| 262         | Weight loss            | ICD9             |
| 2630        | Weight loss            | ICD9             |
| 2631        | Weight loss            | ICD9             |
| 2632        | Weight loss            | ICD9             |
| 2638        | Weight loss            | ICD9             |
| 2639        | Weight loss            | ICD9             |
| 78321       | Weight loss            | ICD9             |
| 78322       | Weight loss            | ICD9             |
| E40         | Weight loss            | ICD10            |
| E41         | Weight loss            | ICD10            |
| E42         | Weight loss            | ICD10            |
| E43         | Weight loss            | ICD10            |
| E440        | Weight loss            | ICD10            |
| E441        | Weight loss            | ICD10            |
| E45         | Weight loss            | ICD10            |
| E46         | Weight loss            | ICD10            |
| R634        | Weight loss            | ICD10            |
| R64         | Weight loss            | ICD10            |

**Supplemental table 6. Sensitivity analysis—Multivariable Cox proportional hazards regression model describing patient factors associated with completion of a gastroenterology encounter in the expanded GERD cohort (n = 1,391,537)**

|                                                             | aHR  | 95% CI        |
|-------------------------------------------------------------|------|---------------|
| <b>Demographics</b>                                         |      |               |
| Age (ref: 50-59)                                            |      |               |
| 18-29                                                       | 0.57 | (0.53 - 0.61) |
| 30-39                                                       | 0.62 | (0.60 - 0.65) |
| 40-49                                                       | 0.75 | (0.73 - 0.76) |
| 60-69                                                       | 0.97 | (0.95 - 0.99) |
| 70-79                                                       | 0.90 | (0.88 - 0.91) |
| 80+                                                         | 0.71 | (0.66 - 0.77) |
| Female                                                      | 1.04 | (1.02 - 1.05) |
| Race/ethnicity (ref: White)                                 |      |               |
| Asian                                                       | 0.96 | (0.93 - 0.99) |
| Black                                                       | 0.90 | (0.88 - 0.92) |
| Hispanic                                                    | 0.91 | (0.88 - 0.93) |
| Unknown                                                     | 1.05 | (1.02 - 1.09) |
| Year of GERD diagnosis                                      | 1.00 | (0.99 - 1.02) |
| Charlson-Deyo score                                         | 0.99 | (0.98 - 0.99) |
| High-dimensional utilization score                          | 0.99 | (0.99 - 0.99) |
| <b>Upper gastrointestinal malignancy risk factors/signs</b> |      |               |
| Family history of gastrointestinal cancer                   | 1.33 | (1.27 - 1.40) |
| <i>Helicobacter pylori</i> infection                        | 1.39 | (1.31 - 1.47) |
| Iron deficiency anemia                                      | 1.58 | (1.57 - 1.60) |
| Obesity                                                     | 1.43 | (1.41 - 1.46) |
| Tobacco use                                                 | 1.48 | (1.46 - 1.50) |
| <b>Gastrointestinal signs/symptoms</b>                      |      |               |
| Abdominal pain                                              | 2.15 | (2.09 - 2.21) |
| Diarrhea                                                    | 1.43 | (1.39 - 1.46) |
| Dysphagia                                                   | 2.30 | (2.12 - 2.49) |
| Nausea/vomiting                                             | 1.50 | (1.46 - 1.55) |
| Melena/rectal bleeding                                      | 1.89 | (1.81 - 1.98) |
| Weight loss                                                 | 1.54 | (1.51 - 1.57) |

Caption: The model was also adjusted for U.S. census division (data not shown)

Supplemental figure 1. Study design diagram

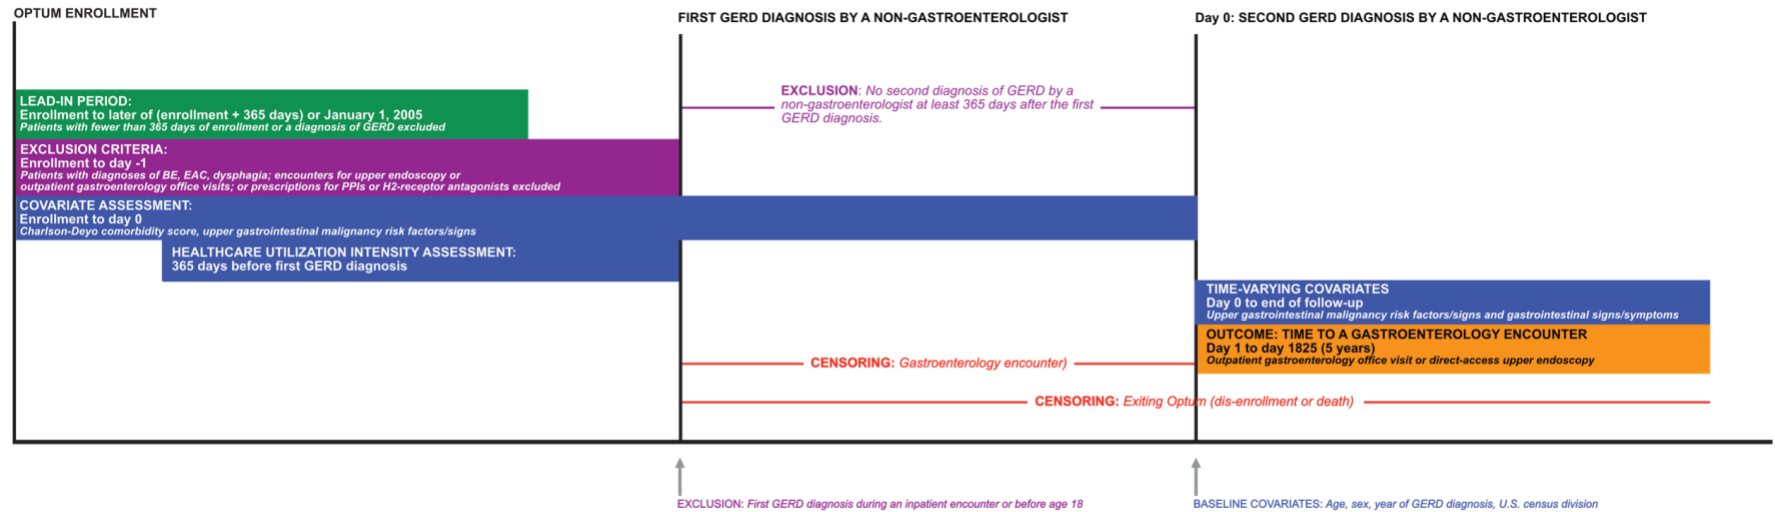

Abbreviations: PPI—proton pump inhibitor

Upper gastrointestinal malignancy risk factors/signs: Family history of gastrointestinal cancer (surrogate for family history of EAC), *Helicobacter pylori* infection, iron deficiency anemia, obesity, and tobacco smoking

Gastrointestinal signs/symptoms: Abdominal pain, diarrhea, dysphagia, nausea/vomiting, melena/rectal bleeding, and weight loss

**Supplemental figure 2. Kaplan-Meier time to encounter with a gastroenterology provider after a diagnosis of chronic GERD (n = 484,023)**

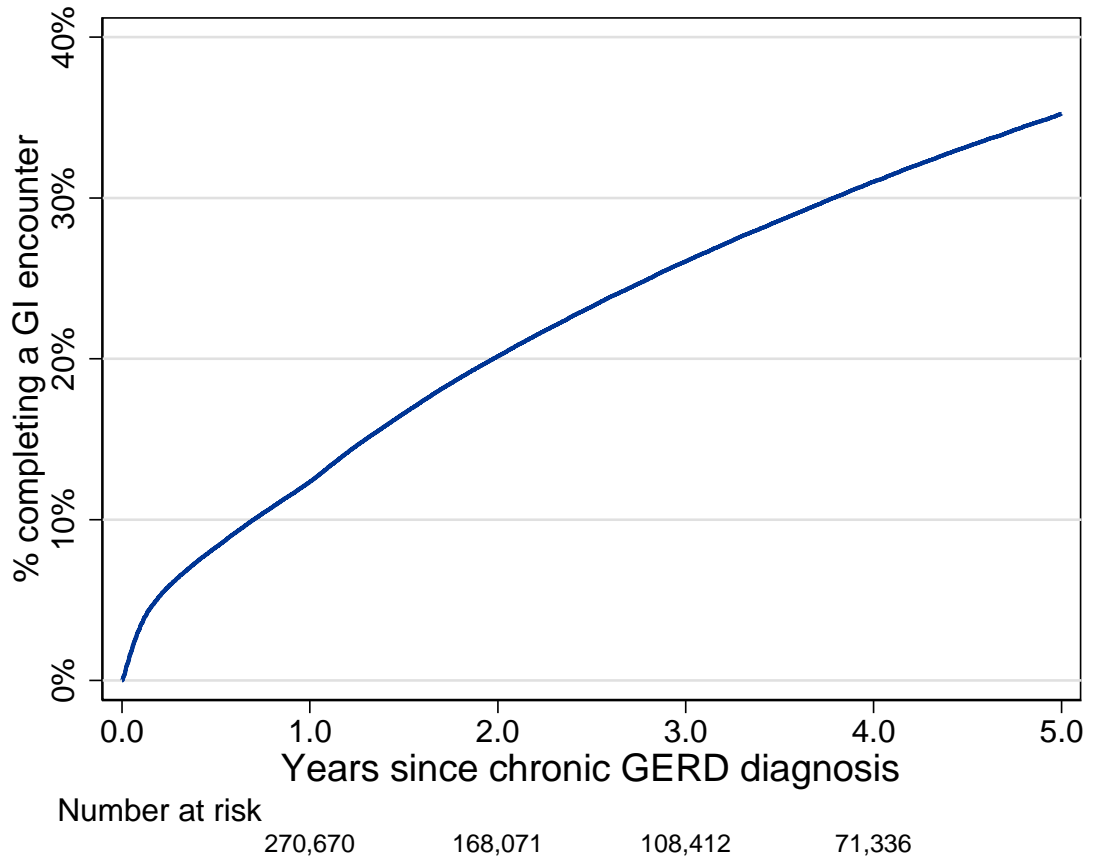

**Supplemental figure 3. Sensitivity analysis—Kaplan-Meier time to encounter with a gastroenterology provider in the expanded GERD cohort (n = 1,391,537)**

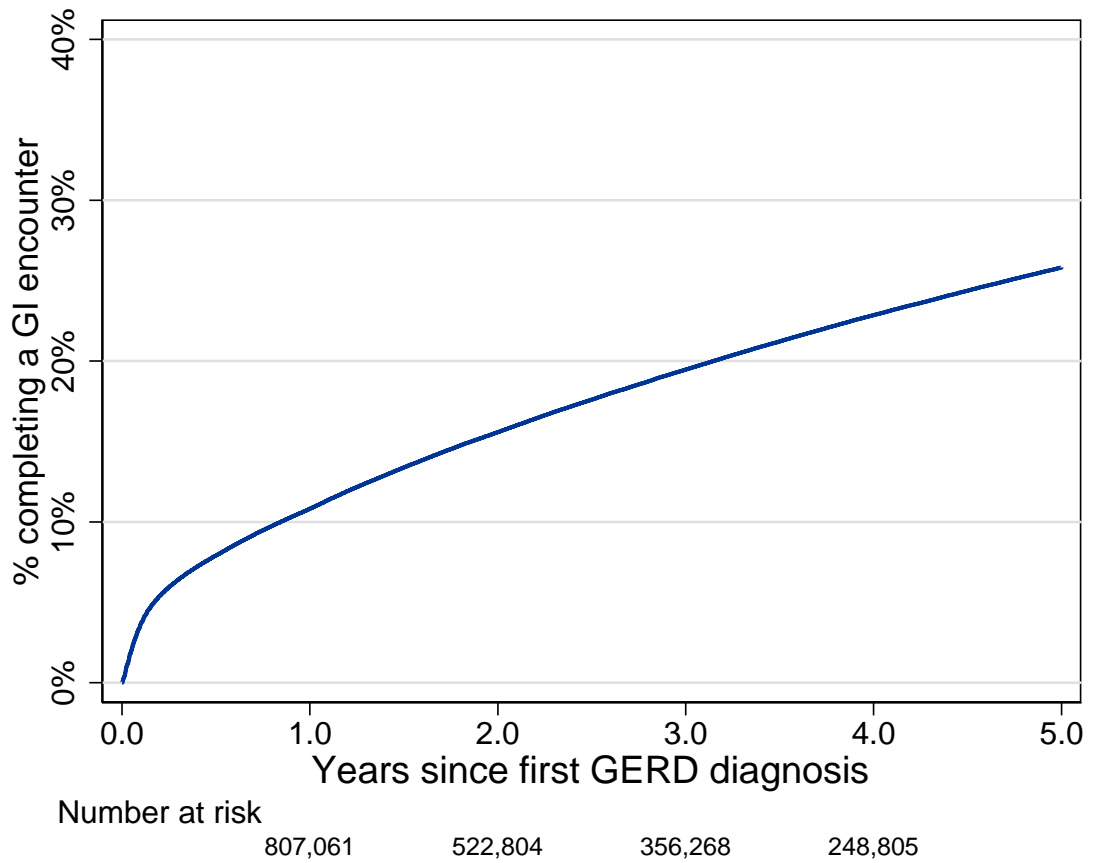

Supplement: mmc1.pdf [file mmc1.pdf]
